# Supplementary material
Source: PubMed Central journal article supplement (PMC7293901)
Supplement: NIHMS1596612-supplement-Supplemental.pdf [file NIHMS1596612-supplement-Supplemental.pdf]

## Supplementary Materials for

### **An off-the-shelf artificial cardiac patch improves cardiac repair after myocardial infarction in rats and pigs**

Ke Huang, Emily W. Ozpinar, Teng Su, Junnan Tang, Deliang Shen, Li Qiao, Shiqi Hu, Zhenhua Li, Hongxia Liang, Kyle Mathews, Valery Scharf, Donald O. Freytes, Ke Cheng\*

\*Corresponding author. Email: ke\_cheng@ncsu.edu, ke\_cheng@unc.edu

Published 8 April 2020, *Sci. Transl. Med.* **12**, eaat9683 (2020)  
DOI: 10.1126/scitranslmed.aat9683

#### **This PDF file includes:**

##### Materials and Methods

Fig. S1. Characterization of artCP.

Fig. S2. Effects of artCP on endothelial cells in vitro.

Fig. S3. Effects of artCP on CPC differentiation in vitro.

Fig. S4. synCSC retention and biodistribution in rats.

Fig. S5. Immunogenicity of artCP in the post-MI rat heart.

Fig. S6. Rat heart dimensions measured by echocardiography.

Fig. S7. H&E staining of artCP and adjacent myocardium 21 days after transplantation in a rat.

Fig. S8. Treatment effects from empty, cryopreserved, or fresh artCP transplantation in rats.

Fig. S9. Heart morphometric analysis after patch transplantation in rats.

Fig. S10. Liver and kidney functions 21 days after artCP transplantation in rats.

Fig. S11. Percentage of pH3<sup>+</sup> or Ki67<sup>+</sup> cardiomyocytes in total cells 21 days after patch transplantation in rats.

Fig. S12. Staining of proliferation marker Aurora B after artCP or myoECM transplantation in rats.

Fig. S13. Analyses of myocardial proliferation and apoptosis 21 days after patch transplantation in rats.

Fig. S14. Effects of artCP therapy on angiomyogenesis in rats.

Fig. S15. Cardiac functional assessment of artCP therapy in a porcine MI model.

Fig. S16. Effects of artCP transplantation on liver and kidney functions in the porcine MI model.

Fig. S17. Immunogenicity analysis of artCP transplantation in the porcine MI model.

Table S1. myoECM average tension/stress versus strain.

Table S2. NHT average tension/stress versus strain.

Reference (69)

## **MATERIALS AND METHODS**

### ***Derivation of human cardiac stromal cells (CSCs)***

Human cardiosphere-derived CSCs were obtained from human hearts as previously described (10). Briefly, myocardial samples harvested from human hearts were cut into fragments of 2 mm<sup>3</sup>, washed with phosphate-buffered saline, and partially digested with collagenase (Sigma-Aldrich). The tissue fragments were cultured as cardiac explants on a 0.5 mg/ml fibronectin (Corning) solution coated surface in Iscove's modified Dulbecco's medium (Invitrogen) containing 20% fetal bovine serum (Corning). A layer of stromal-like cells emerged from the cardiac explant with phase-bright cells over them. The explant-derived cells were harvested using TryPEL Select (Gibco). Harvested cells were seeded at a density of 2×10<sup>4</sup> cells/ml in Ultra Low Attachment flasks (Corning) for cardiosphere formation. In about one week, explant-derived cells spontaneously aggregated into cardiospheres. The cardiospheres were collected and plated onto fibronectin-coated surfaces to generate cardiosphere-derived CSCs. All cultures were incubated in 5% CO<sub>2</sub> at 37°C. Our lab has banked >50 human cardiosphere-derived CSC lines. These cells were ready for use in the lab so there was no need for recruitment of new human subjects.

### ***Enzyme-mediated degradation of artCPs***

A round-shaped myoECM or artCP (diameter: 5 mm, thickness: 1 mm) was placed in deionized water for 24 h and then placed in HEPES-buffered saline (HBS) solution with 0.2 mg/mL sodium azide (Sigma-Aldrich) and 2 mg/mL collagenase (Sigma-Aldrich). As control, a round-shaped artCP (diameter: 5 mm, thickness: 1 mm) was placed in HBS solution with 0.2

mg/mL sodium azide. Samples were weighed and incubated at 37 °C for five continuous days. Three samples from each group were weighed and imaged on each day.

### ***Cardiac functional assessment of rats***

To measure rat cardiac dimensions and function, echocardiography was performed at 4h and 21 days after MI surgical operation following induction of anesthesia with a 1.5% isoflurane-oxygen mixture. Echocardiography was performed with a Philips Cx-30 Ultrasound System with a L15-7io high frequency probe. Two-dimensional long axis images were recorded from the left caudal (apical) view. Two-dimensional guided M-mode images at chordae tendineae level were evaluated. M-mode measurements of left ventricle end-diastolic and end-systolic dimensions (LVEDD and LVESD, respectively) were performed by using the leading-edge method of the American Society of Echocardiography (69). For estimation of each parameter, the average of three measurements from three different cycles in an image was obtained. Left ventricular end-diastolic and systolic volumes (LVEDV and LVESV, respectively) were calculated by the biplane method of disks (modified Simpson's rule). Ejection fraction (EF) was determined by using  $(LVEDV-LVESV/LVEDV) \times 100\%$ , and fractional shortening (FS) was calculated from the M-mode echocardiography images as  $(LVEDD-LVESD/LVEDD) \times 100\%$ .

### ***Heart morphometry studies***

After all animals were euthanized, hearts from rats or cubic pieces (1×1×1 cm) of infarcted pig hearts were collected and frozen in optimum cutting temperature (OCT) compound (Tissue-Tek) after equilibration with increasing sucrose solutions up to 30% overnight. Hearts were then snap-frozen in liquid nitrogen, and cryosectioned with a thickness of 5 µm from the apex to the ligation level with 100 µm intervals for Masson's Trichrome staining. Masson's

trichrome staining was performed as described in previous studies (40,41). Images were acquired with a PathScan Enabler IV slide scanner (Advanced Imaging Concepts). From the Masson's trichrome images, morphometric parameters including viable myocardium and infarct thickness were measured in each section with ImageJ software. The cryo-sectioned with a thickness of 10 µm for Haematoxylin and eosin staining (H&E). Slides were fixed in Hematoxylin (Sigma-Aldrich) for 5 min at room temperature, and then rinsed in running water for 2 minutes; after decolorizing in acid alcohol for 2 seconds, rinsed again in sodium bicarbonate for 5 dips; rinsed out container with Dehydrant after 95% iso for 30 seconds, and then fixed in Eosin (Sigma-Aldrich) for 2 minutes, and then washed in dehydrant 100% (Richard-Allan Scientific) and Xylolene (VWR) for 3 times. The slides were photographed using an AZ100 multi-purpose zoom microscope system.

#### ***Triphenyltetrazolium chloride (TTC) assay***

TTC assay was performed to differentiate the viable cardiac tissue and the infarcted cardiac tissue. Sterilized solution of 2,3,5-Triphenyltetrazolium Chloride (TTC) was made by dissolving TTC (2g; MP Biomedicals) into 200 ml of sterilized PBS and then pre-warmed at 37°C incubator for 30 min. The heart was collected and washed with sterilized PBS and then placed in freezer until the heart became stiff. Five sections (1cm in thickness) were cut from Apex to left ventricle ligation level and incubated in pre-warmed TTC solution at 37 °C for 30 mins. Afterwards, the sections were fixed in 10% formaldehyde solution for 2 hours.

#### ***Cardiac functional assessment of pigs***

To measure pig cardiac dimensions and function, echocardiography was performed 24 h and 7 days after MI surgical operation. Following induction of sedation with TKX cocktail (1 mL/13-30 kg IM) and anesthesia with a mixture of isoflurane (0-5% in 100% oxygen),

echocardiography was performed using a Philips Cx-30 Ultrasound System with an S4-2 broadband sector array transducer. Two-dimensional long axis images were recorded from the left caudal (apical) view. Two-dimensional guided M-mode images at chordae tendineae level were evaluated. M-mode measurements of left ventricle end-diastolic and end-systolic dimensions (LVEDD and LVESD, respectively) were performed by using the leading-edge method of the American Society of Echocardiography (69). For estimation of each parameter, the average of three measurements from three different cycles in an image was obtained. Left ventricular end-diastolic and systolic volumes (LVEDV and LVESV, respectively) were calculated by the biplane method of disks (modified Simpson's rule). Ejection fraction (EF) was determined by using  $(LVEDV-LVESV/LVEDV) \times 100\%$ , and fractional shortening (FS) was calculated from the M-mode echocardiography images as  $(LVEDD-LVESD/LVEDD) \times 100\%$ .

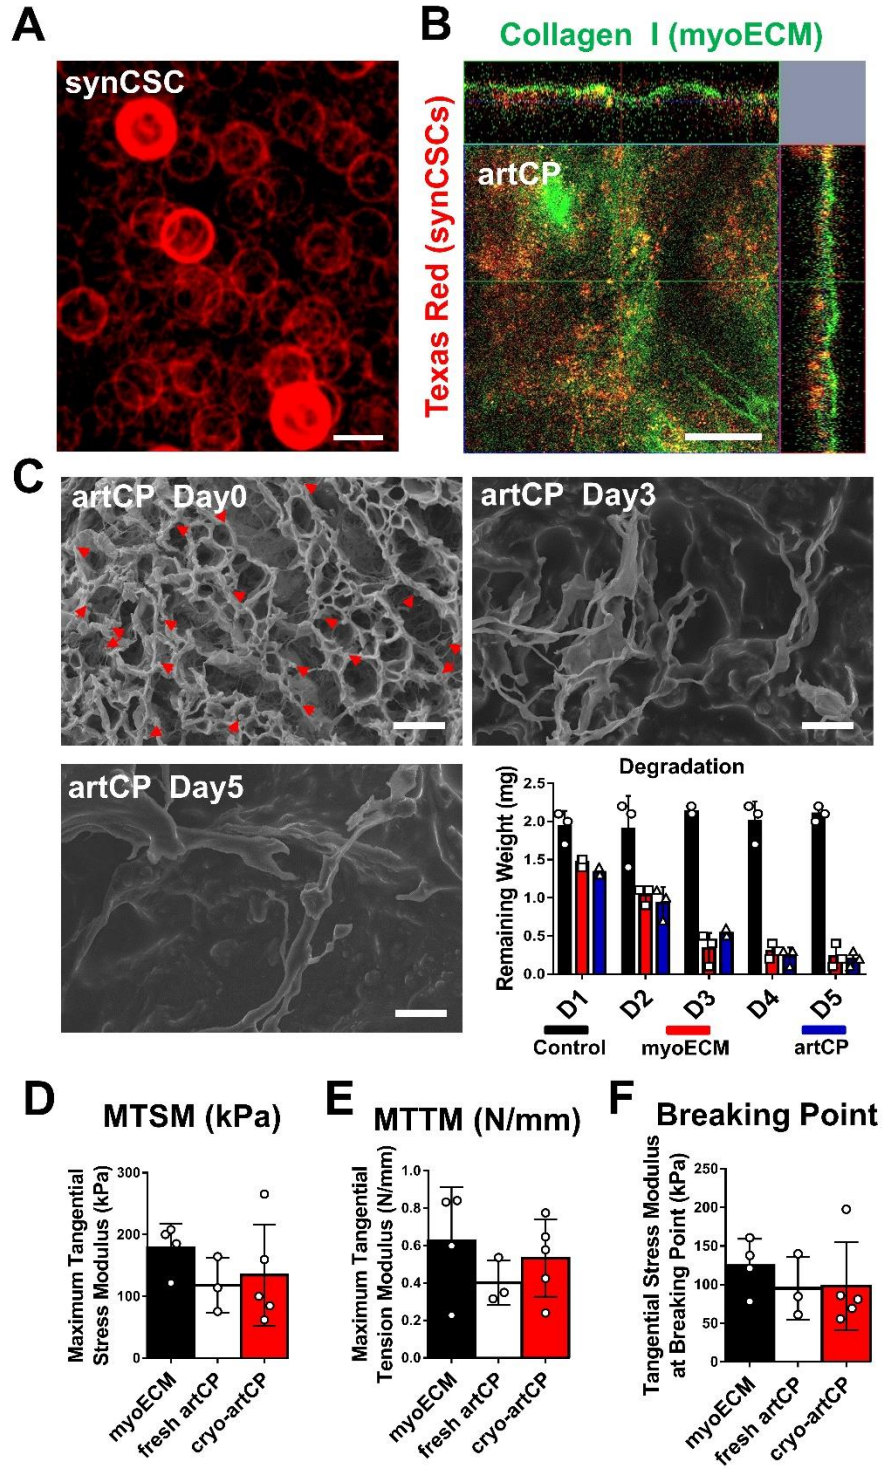

**Fig. S1. Characterization of artCP.** (A) Representative fluorescent micrographs showing DiD labelled synCSCs. Scale bar = 10  $\mu$ m. (B) Representative 3D confocal images showing the

distribution of synCSCs (red; DiD-labeled) in myoECM (green; stained with anti-collagen I antibodies). Scale bar = 25  $\mu\text{m}$ . **(C)** Enzyme-mediated degradation of myoECM and artCPs. The control group was artCP in HBS solution with 0.2 mg/mL sodium azide.  $n = 3$  in each group. Scale bars = 50  $\mu\text{m}$ . Maximum tangential stress modulus **(D)**, maximum tangential tension modulus **(E)**, and tangential stress modulus at breaking point **(F)** were measured by uniaxial mechanical testing.  $n = 4$  in myoECM group,  $n = 3$  in fresh artCP group,  $n = 5$  in cryo-artCP group. All data are means  $\pm$  SD. Comparisons among groups were performed using one-way ANOVA followed by post hoc Bonferroni test.

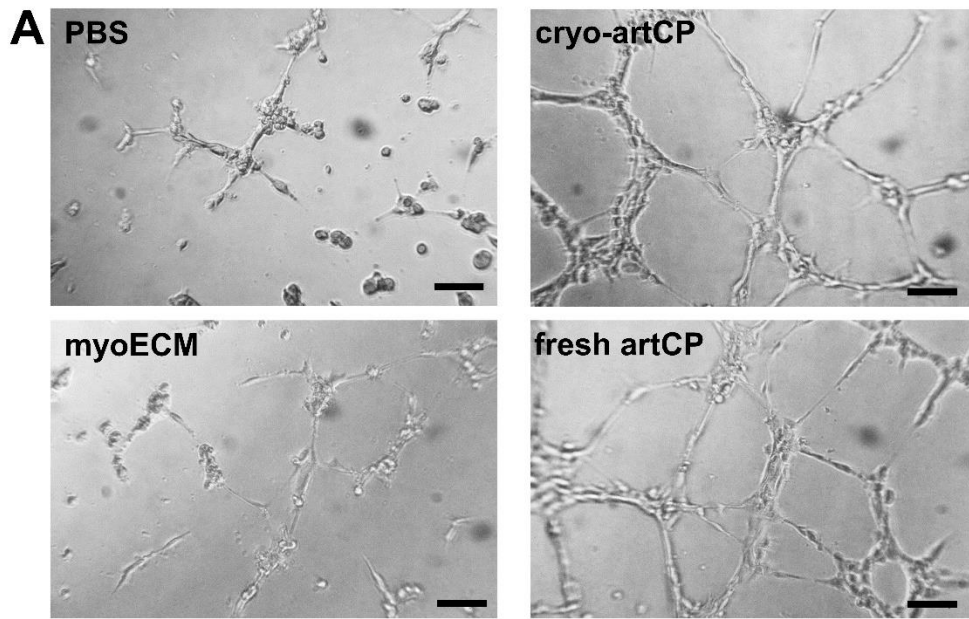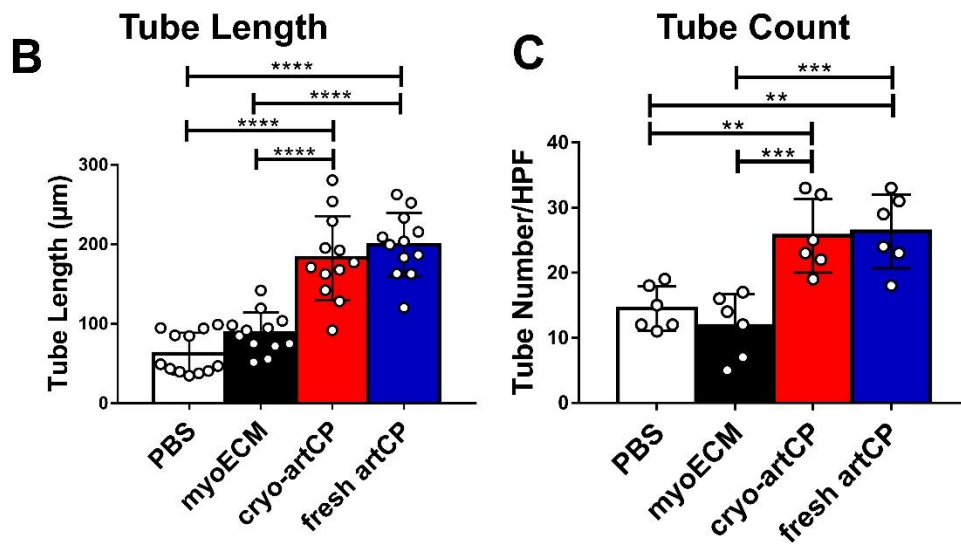

**Fig. S2. Effects of artCP on endothelial cells in vitro.** (A) Representative micrographs showing tube formation of HUVECs in PBS, myoECM, cryo-artCP and fresh artCP groups.



Scale bars = 100  $\mu\text{m}$ . The tube lengths (**B**) ( $n = 12$ ) and tube numbers (**C**) ( $n = 6$ ) were quantified by ImageJ. All data are means  $\pm$  SD. Comparisons among groups were performed using one-way ANOVA followed by post hoc Bonferroni test. The comparisons between samples are indicated by lines, and the statistical significance is indicated by asterisks above the lines.  $**P < 0.01$ ,  $***P < 0.001$  and  $****P < 0.0001$ .

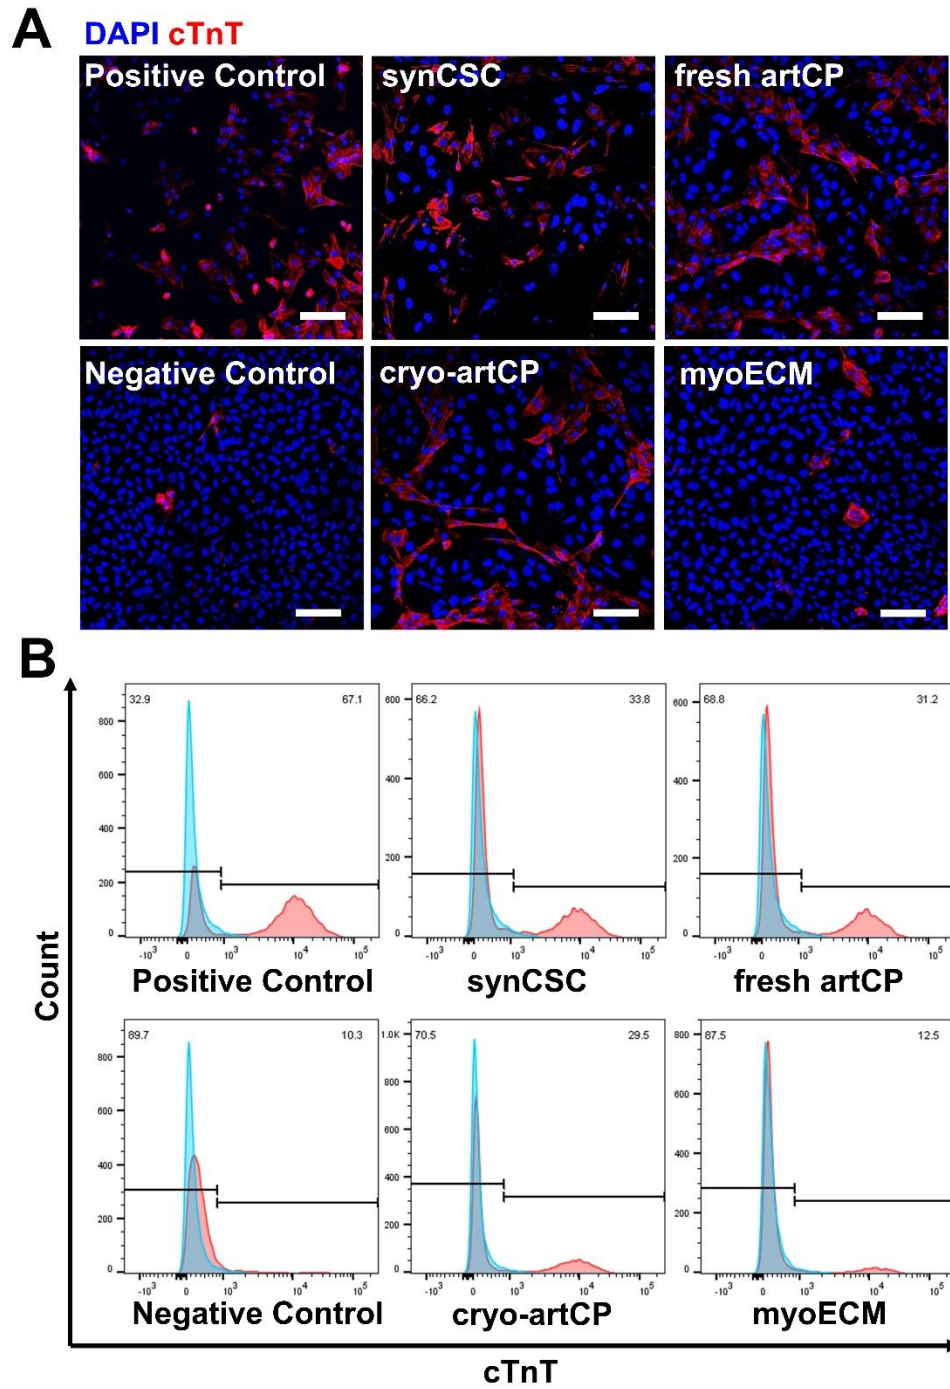

**Fig. S3. Effects of artCP on CPC differentiation in vitro.** (A) Representative micrographs showing differentiation of CPCs in positive control, negative control, PBS, myoECM, cryo-

artCP and fresh artCP groups. Scale bars = 100  $\mu\text{m}$ . (B) cTnT<sup>+</sup> cardiomyocytes were quantified through flow cytometry and analyzed with FlowJo software.

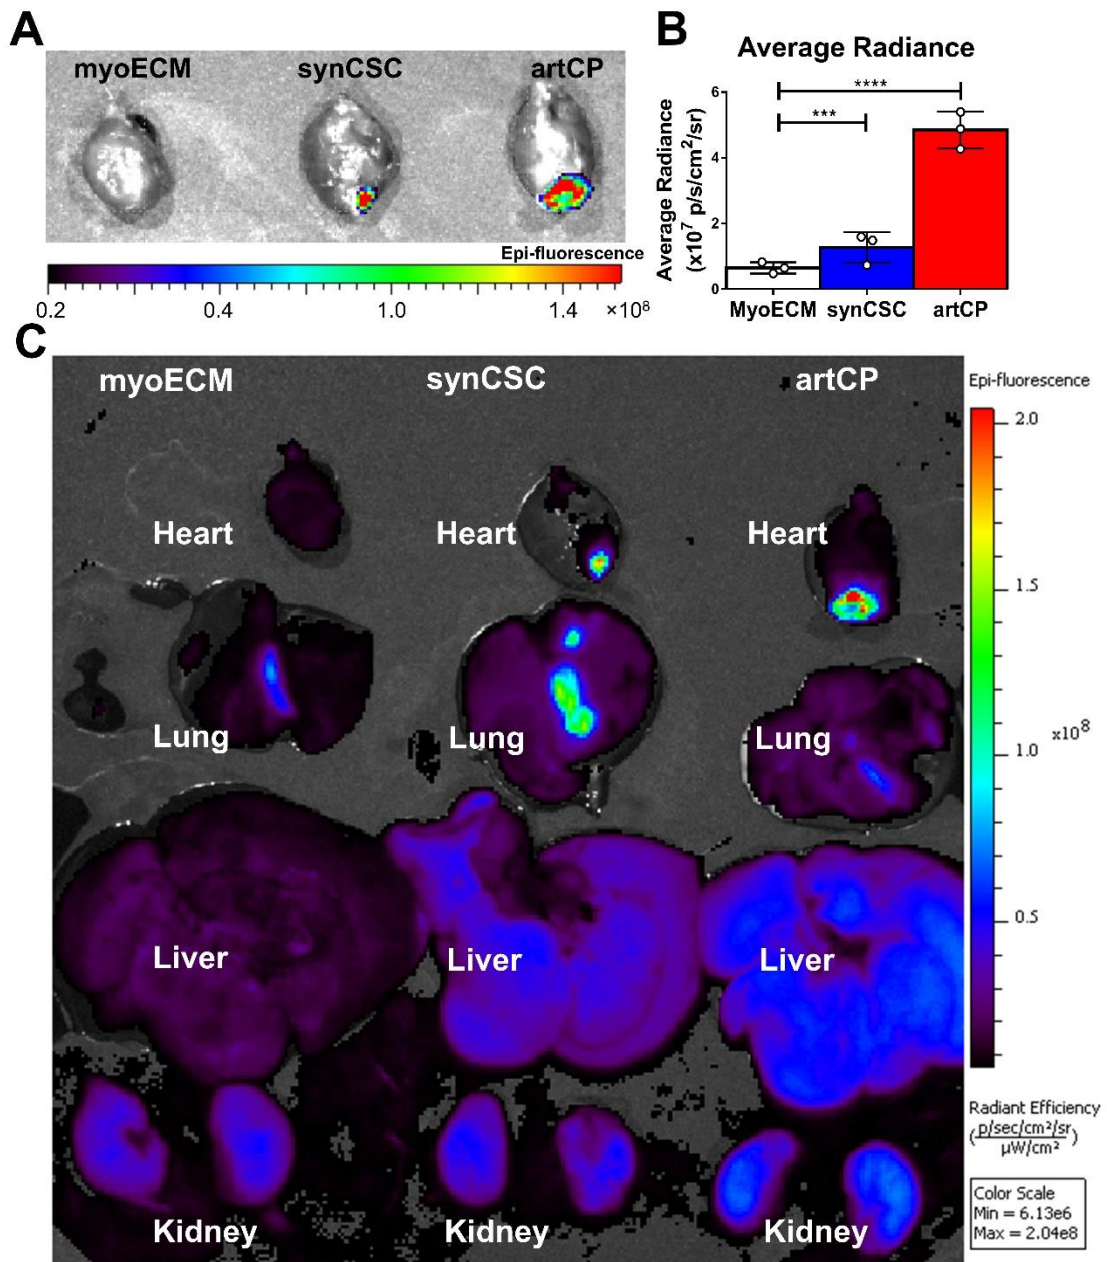

**Fig. S4. synCSC retention and biodistribution in rats.** To track the synCSC in vivo, we transplanted a DiR labelled artCP onto the heart of a rat with MI. Other rats received intramyocardial injection of DiR labelled synCSC or transplantation of empty myoECM transplantation as controls. **(A)** The hearts were collected and placed in the Xenogen IVIS imaging system (Caliper Life Sciences) to detect DiR fluorescence as an indicator of synCSC retention in the heart. **(B)** The average radiance in each group was measured by the Xenogen IVIS software.  $n = 3$  in each group. **(C)** All major organs were collected and placed in the IVIS system for biodistribution studies. All data are means  $\pm$  SD. Comparisons among groups were performed using one-way ANOVA followed by post hoc Bonferroni test. The comparisons between samples are indicated by lines, and the statistical significance is indicated by asterisks above the lines. \*\*\* $P < 0.001$  and \*\*\*\* $P < 0.0001$ .

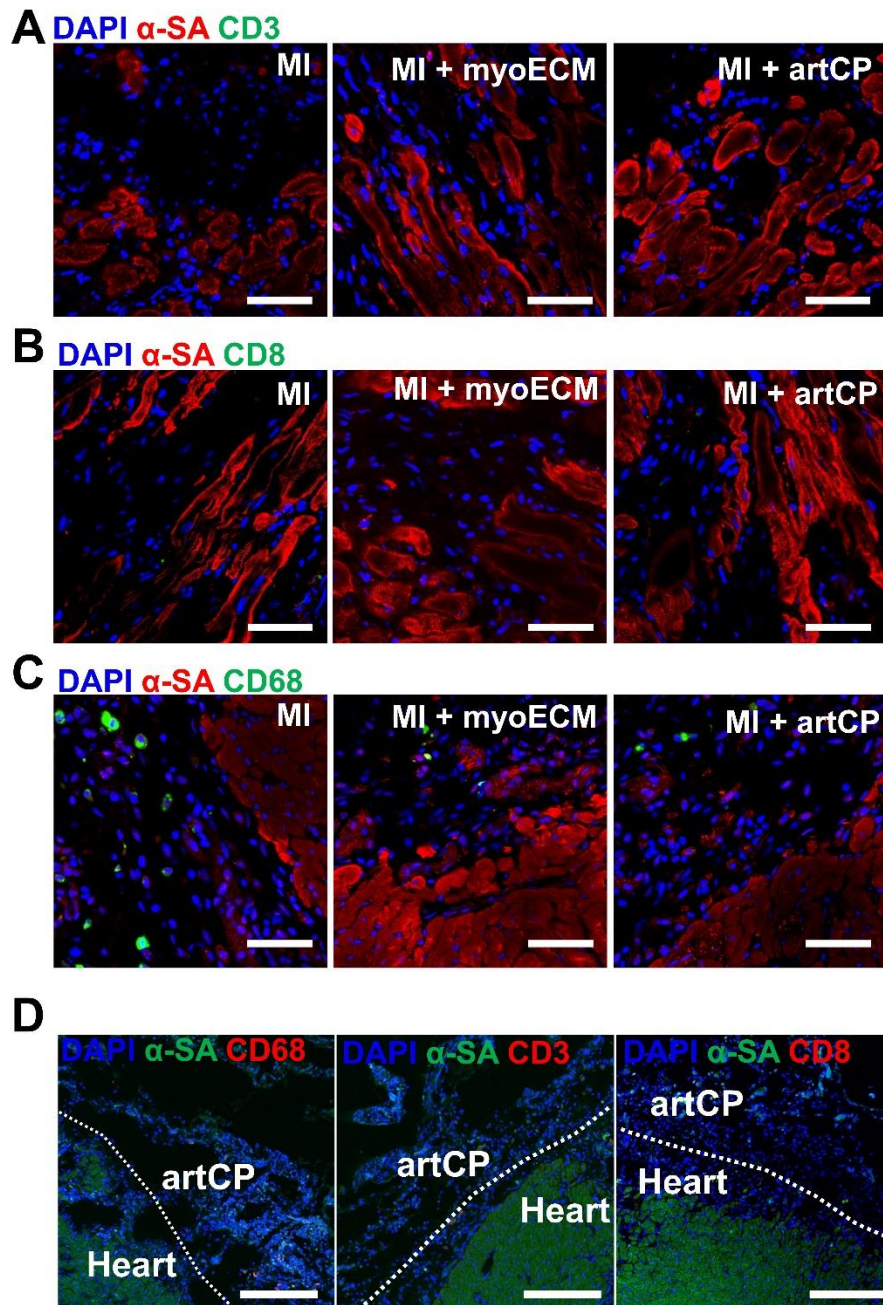

**Fig. S5. Immunogenicity of artCP in the post-MI rat heart.** 7 days after artCP or myoECM transplantation we analyzed the infiltration of T-lymphocytes, detected by anti-CD3 (A) (green)

and anti-CD8 (green) **(B)** antibodies. Nuclei were counterstained with DAPI (blue). Scale Bars = 50  $\mu\text{m}$ . **(C)** Macrophages were labelled with anti-CD68 (green) antibodies. Scale Bars = 50  $\mu\text{m}$ . **(D)** The same IHC staining was performed 21 days after transplantation. Cardiomyocytes were counterstained with anti-alpha sarcomeric actinin ( $\alpha$ -SA) and FITC-conjugated secondary antibodies. Scale Bars = 200  $\mu\text{m}$ .

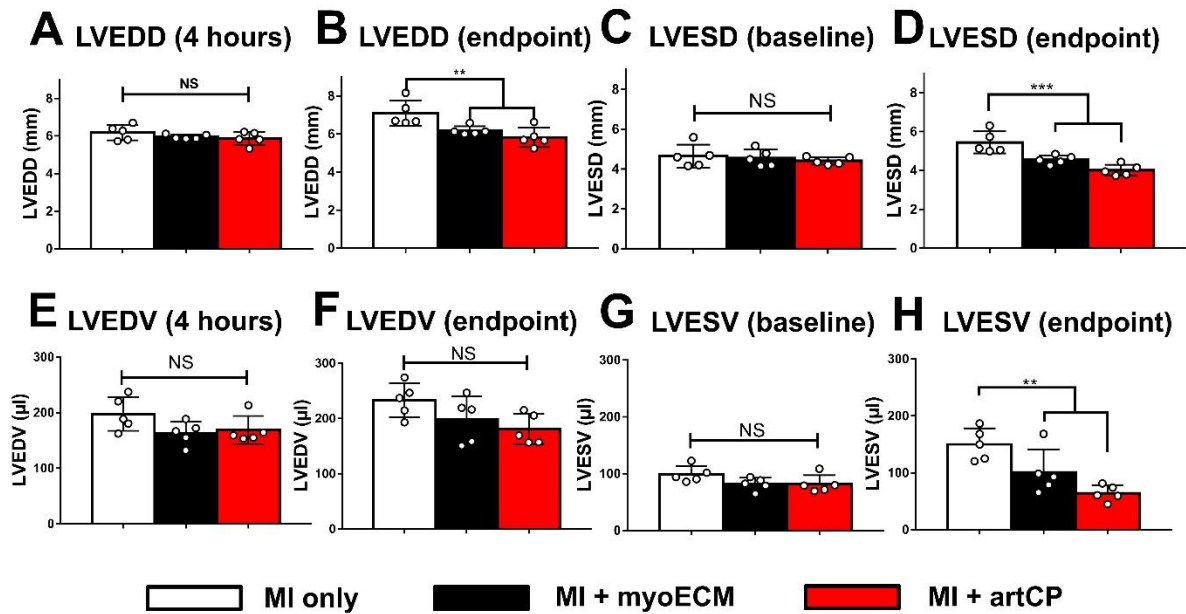

**Fig. S6. Rat heart dimensions measured by echocardiography.** From the M-mode images at chordae tendineae level, left ventricle end-diastolic diameter (LVEDD) at 4 hours (baseline) (A) and 21 days (end point) (B) were measured. Also, the left ventricle end-systolic diameter (LVESD) at 4 hours (baseline) (C) and 21 days (end point) (D) were measured. From B-mode at long axis, left ventricle end-diastolic volume (LVEDV) at 4 hours (baseline) (E) and 21 days (end point) (F) were measured. Also, left ventricle end-systolic volume (LVESV) were also measured at 4 hours (baseline) (G) and 21 days (end point) (H).  $n = 5$  in each group. All data are means  $\pm$  SD. Comparisons among groups were performed using one-way ANOVA followed by post hoc Bonferroni test. The comparisons between samples are indicated by lines, and the statistical significance is indicated by asterisks above the lines. NS indicates  $P > 0.05$ , \*\* $P < 0.01$  and \*\*\* $P < 0.001$ .

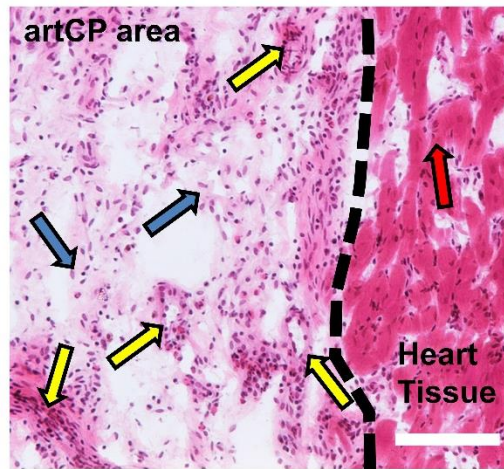

- Microvessels (smooth muscle cells and endothelial cells)  
→ Fibroblasts                      → Cardiomyocytes

**Fig. S7. H&E staining of artCP and adjacent myocardium 21 days after transplantation in a rat.** Representative H&E staining image showing the artCP integration to heart tissue. Fibroblasts, smooth muscle cells, and endothelial cells are indicated by arrows. Scale Bars = 100  $\mu\text{m}$ .



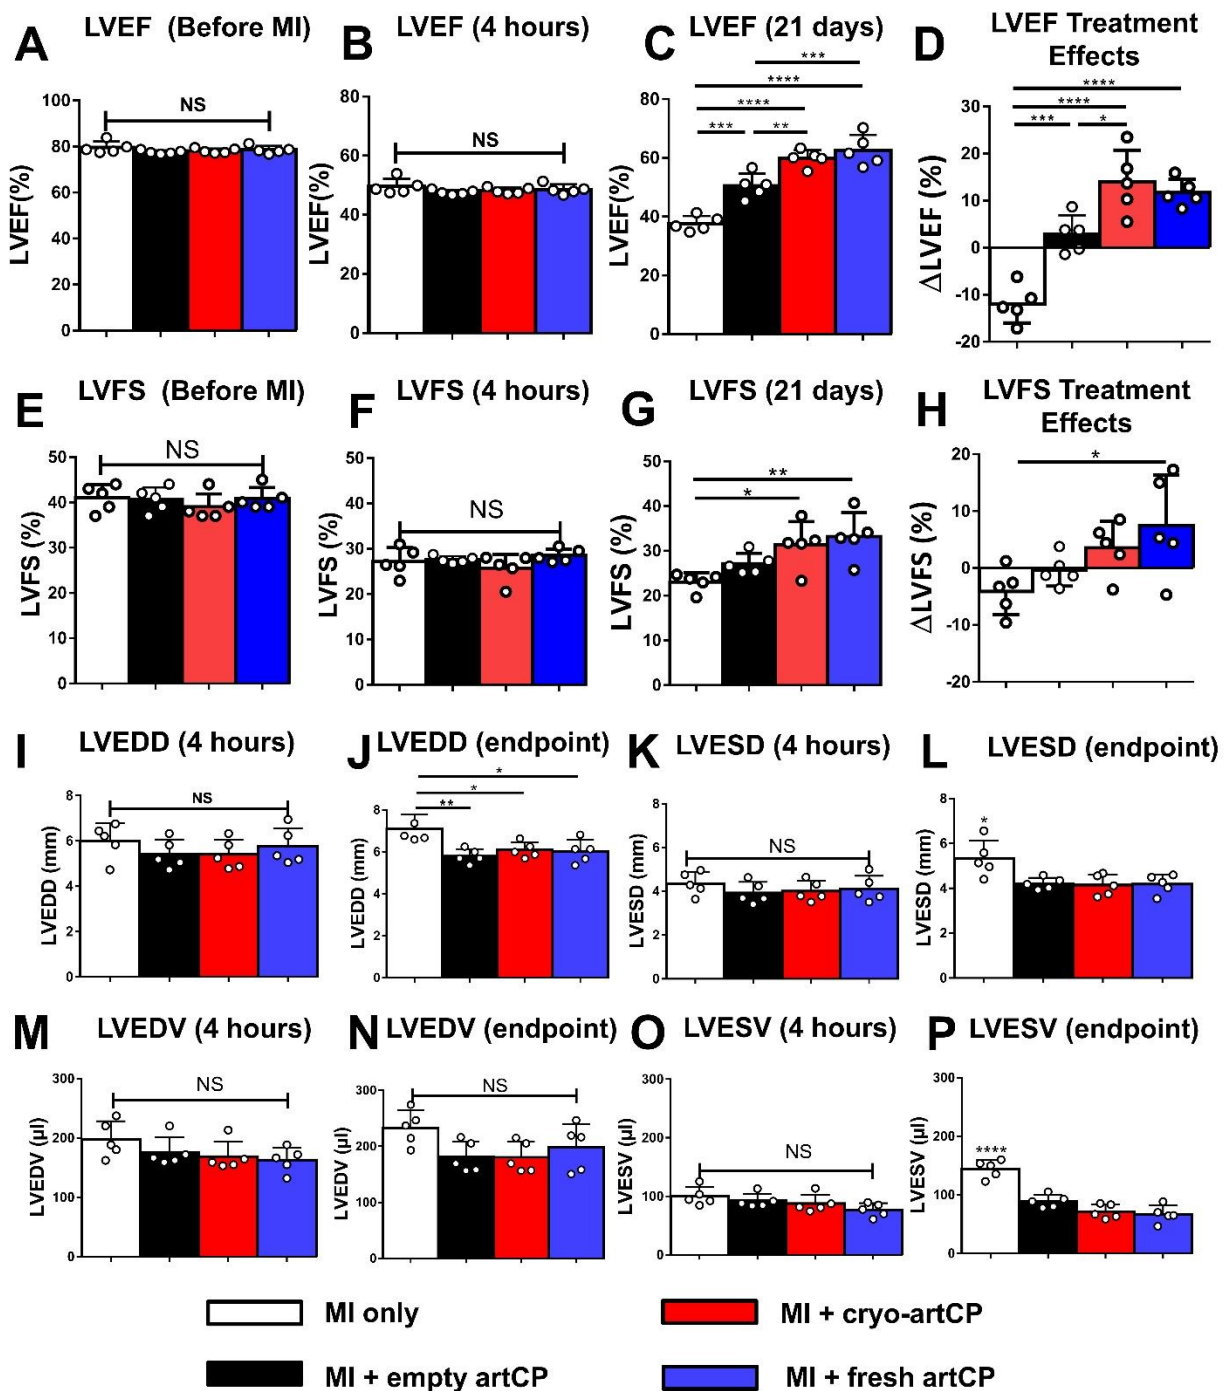

**Fig. S8. Treatment effects from empty, cryopreserved, or fresh artCP transplantation in rats.** LVEFs were analyzed before MI (A), 4 hours after MI (B) and 21 days after MI (C).

Treatment effects were determined as the changes in LVEF from 4 hours after MI to 21 days after MI (**D**). The LVFSs were also analyzed before MI (**E**), 4 hours after MI (**F**) and 21 days after MI (**G**). Treatment effects were determined as the changes in LVFS from 4 hours after MI to 21 days after MI (**H**).  $n = 5$  in each group. From M-mode images at chordae tendineae level, LVEDDs at 4 hours (baseline) (**I**) and 21 days (end point) (**J**) were measured. Likewise, LVESDs at 4 hours (baseline) (**K**) and 21 days (end point) (**L**) were measured. From B-mode at long axis, LVEDVs at 4 hours (baseline) (**M**) and 21 days (end point) (**N**) were measured. LVESVs were also measured at 4 hours (baseline) (**O**) and 21 days (end point) (**P**).  $n = 5$  in each group. All data are means  $\pm$  SD. Comparisons among groups are performed using one-way ANOVA followed by post hoc Bonferroni test. The comparisons between samples are indicated by lines, and the statistical significance is indicated by asterisks above the lines. NS indicates  $P > 0.05$ ,  $*P < 0.05$ ,  $**P < 0.01$ ,  $***P < 0.001$ , and  $****P < 0.0001$ .

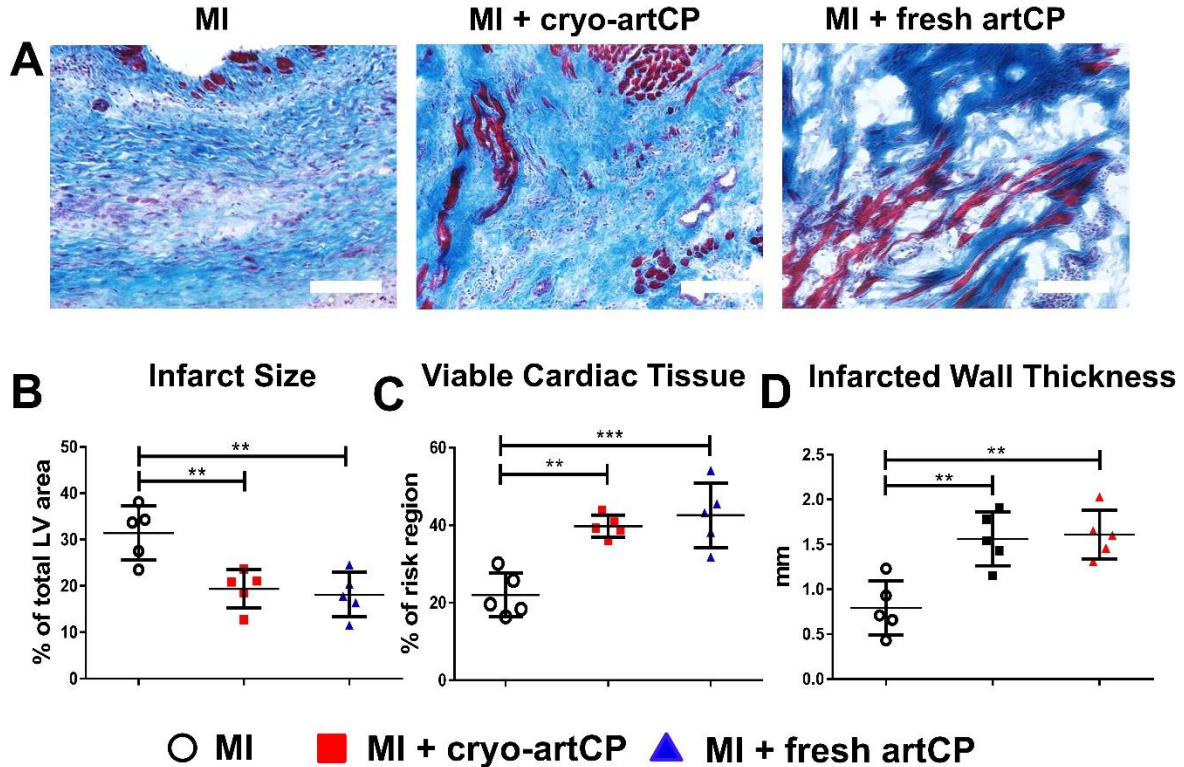

**Fig. S9. Heart morphometric analysis after patch transplantation in rats.** (A) Masson's Trichrome staining was performed 21 days after MI on 5  $\mu$ m cryo-sections. Scale Bars = 100  $\mu$ m. Morphometric parameters including infarct size (B), the percentage of viable myocardium at risk area (C), and infarct wall thickness (D) were measured from the Masson's Trichrome stained images using the NIH ImageJ software.  $n = 5$  in each group. All data are means  $\pm$  SD. Comparisons among groups were performed using one-way ANOVA followed by post hoc Bonferroni test. The comparisons between samples are indicated by lines, and the statistical significance is indicated by asterisks above the lines.  $**P < 0.01$  and  $***P < 0.001$ .

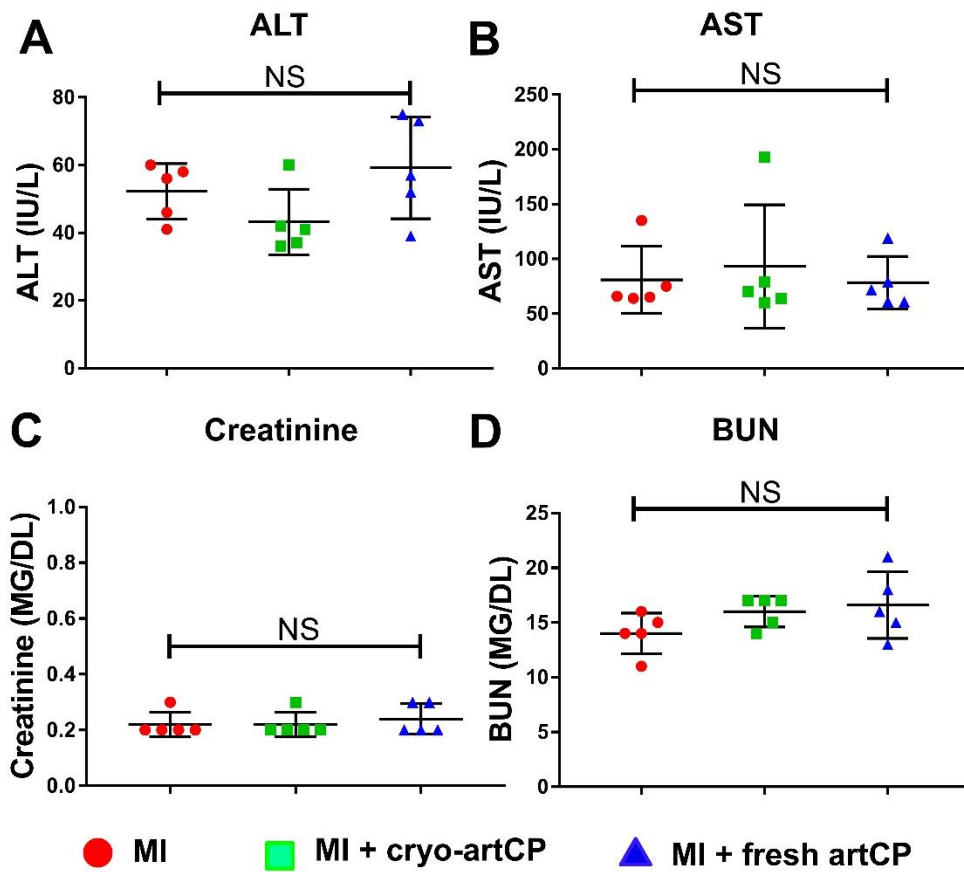

**Fig. S10. Liver and kidney functions 21 days after artCP transplantation in rats.** (A) Alanine aminotransferase (ALT) and (B) aspartate aminotransferase (AST) concentrations in sera. (C-D) Blood creatinine (C) and urea nitrogen (D) concentrations to evaluate the potential kidney toxicity of artCP transplantation.  $n = 5$  in each group. All data are means  $\pm$  SD. Comparisons among groups were performed using one-way ANOVA followed by post hoc Bonferroni test. NS indicates  $P > 0.05$ .

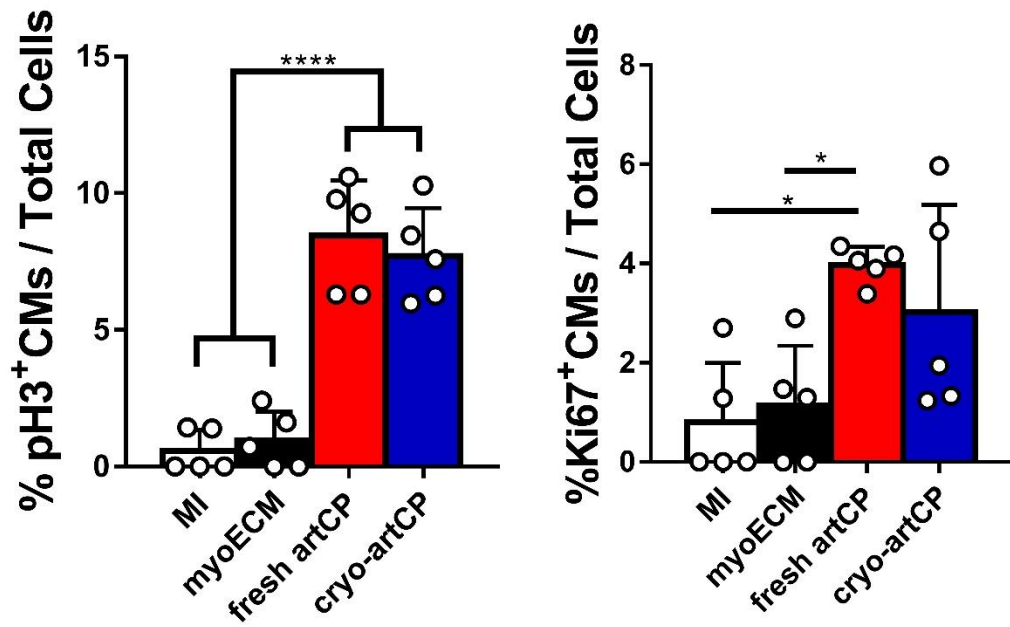

**Fig. S11. Percentage of pH3<sup>+</sup> or Ki67<sup>+</sup> cardiomyocytes in total cells 21 days after patch transplantation in rats.** *n* = 5 in each group. All data are means ± SD. Comparisons among groups were performed using one-way ANOVA followed by post hoc Bonferroni test. \**P* < 0.05 and \*\*\*\**P* < 0.0001.

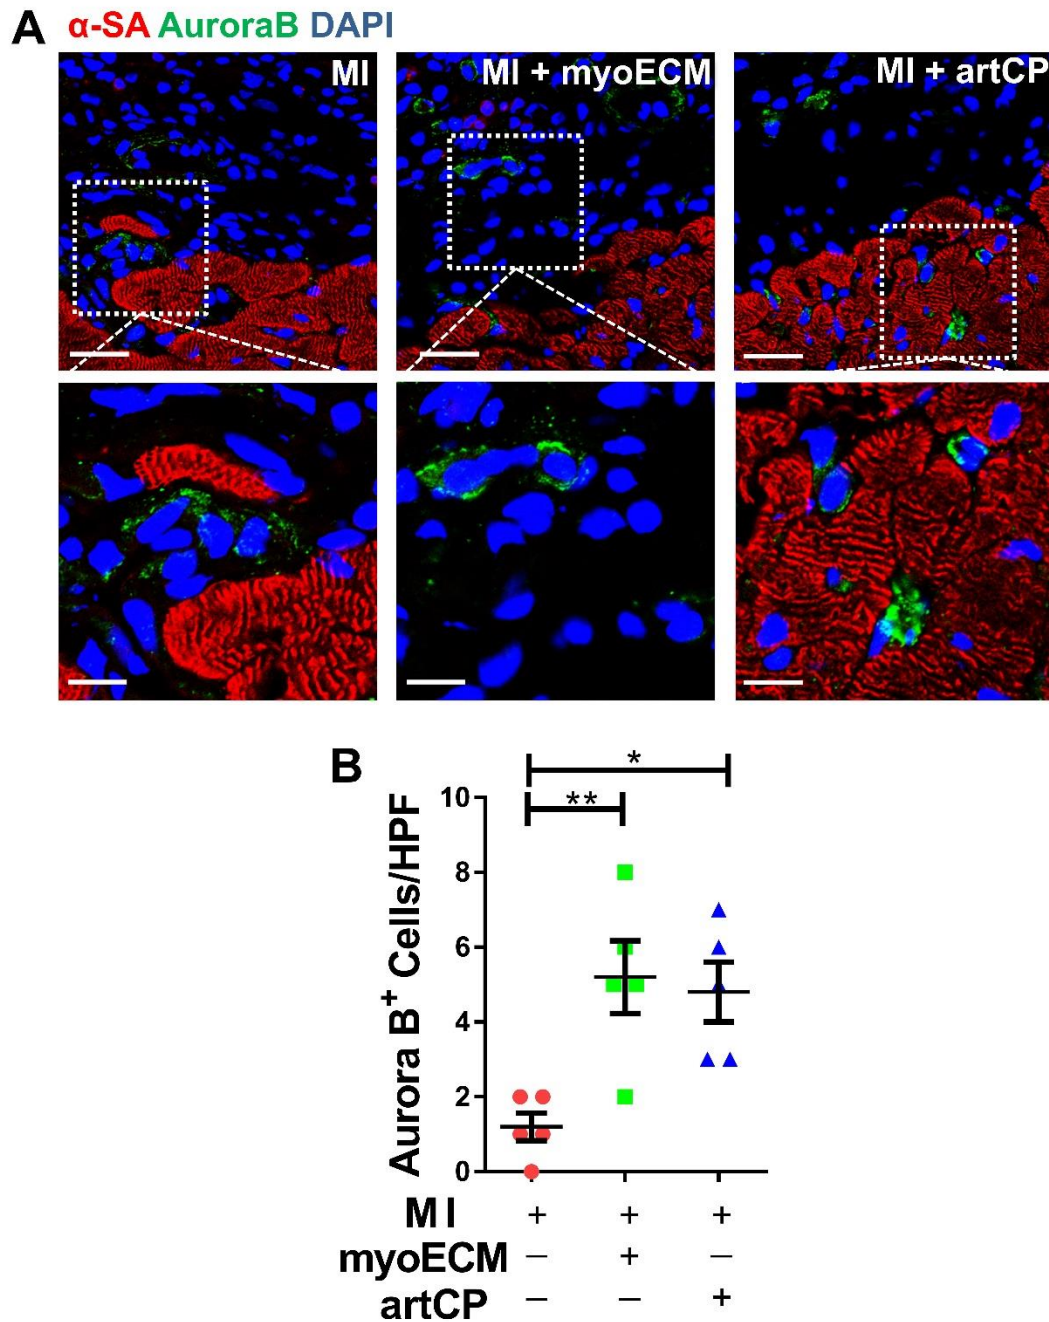

**Fig. S12. Staining of proliferation marker Aurora B after artCP or myoECM transplantation in rats.** (A) Aurora B (green) was detected in the infarcted area from the hearts

of MI only group, artCP, and myoECM transplanted group. Scale bars = 25  $\mu\text{m}$ . Scale bars in snapshot = 10  $\mu\text{m}$ . Regions outlined by dashed box shown at higher magnification below. **(B)** Aurora B<sup>+</sup> cells were quantified.  $n = 5$  per group. All data were means  $\pm$  SD. Comparisons among groups were performed using one-way ANOVA followed by post hoc Bonferroni test. The comparisons between samples are indicated by lines, and the statistical significance is indicated by asterisks above the lines. \* $P < 0.05$  and \*\* $P < 0.01$ .

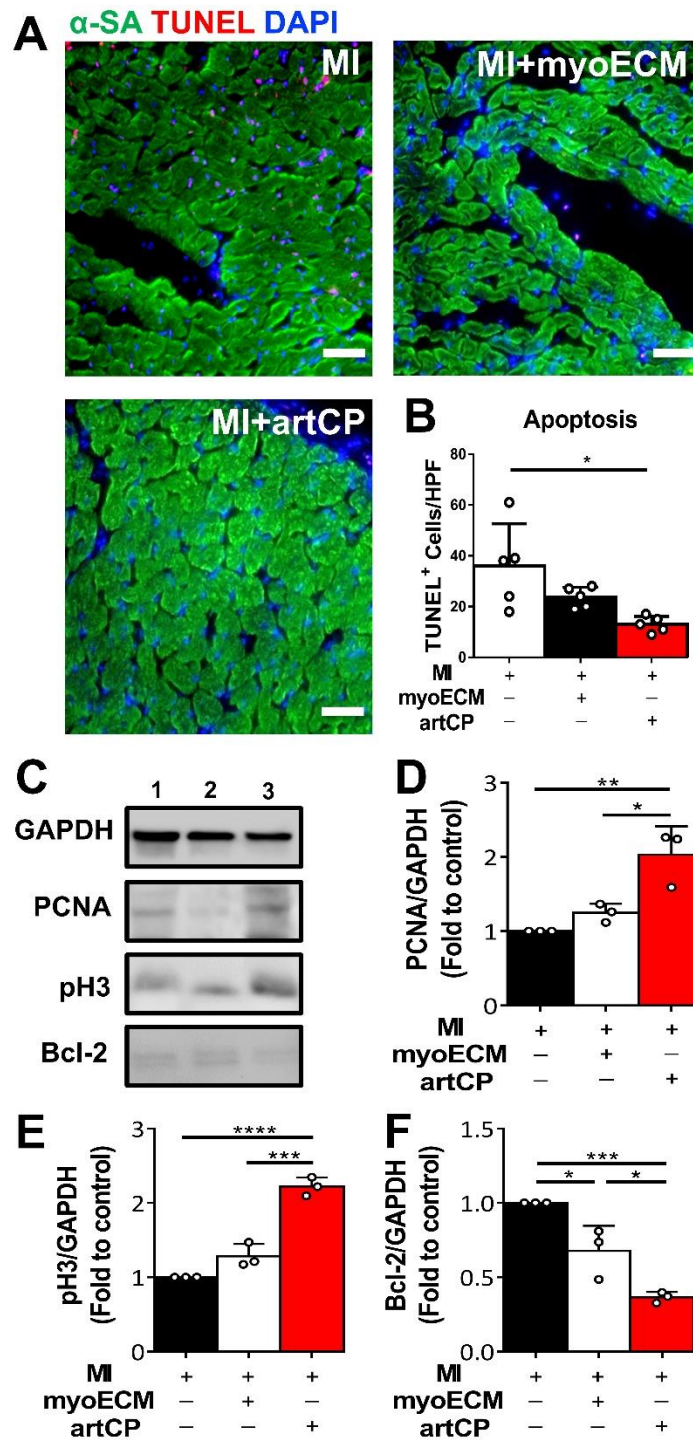

**Fig. S13. Analyses of myocardial proliferation and apoptosis 21 days after patch transplantation in rats.** (A) Representative fluorescent micrographs showing TUNEL<sup>+</sup>



apoptotic cells in the myocardium. All images were taken with an epi-fluorescent microscope (Olympus IX81). Scale bars = 25 $\mu$ m. **(B)** TUNEL<sup>+</sup> cells were counted using the NIH ImageJ software.  $n = 5$  in each group. **(C)** Western blot analyses of pCNA, pH3, and Bcl-2 expressions in the myocardium treated by: 1) MI only group; 2) myoECM group; or 3) artCP group. Quantification of pCNA **(D)**, pH3 **(E)**, and Bcl-2 **(F)** normalized to MI control.  $n = 3$  in each group. All data are means  $\pm$  SD. Comparisons among groups were performed using one-way ANOVA followed by post hoc Bonferroni test. The comparisons between samples are indicated by lines, and the statistical significance is indicated by asterisks above the lines. \* $P < 0.05$ , \*\* $P < 0.01$ , \*\*\* $P < 0.001$  and \*\*\*\* $P < 0.0001$ .

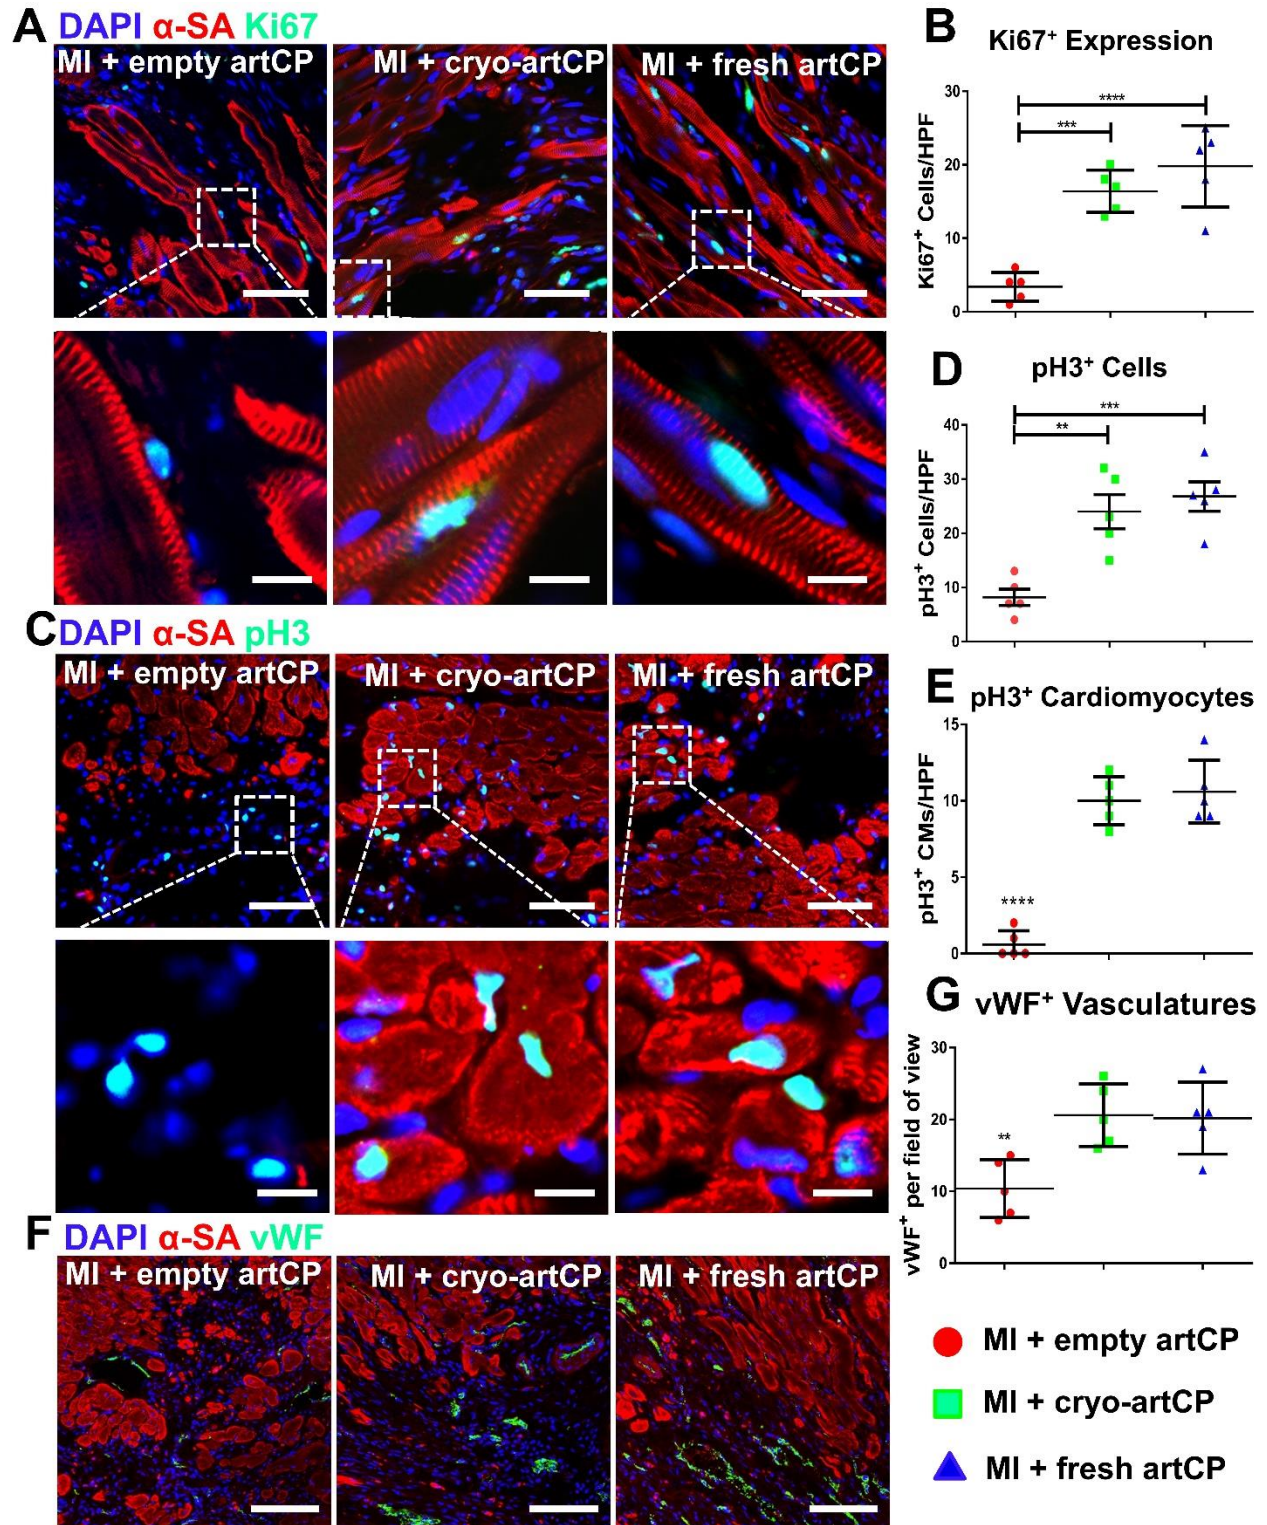

**Fig. S14. Effects of artCP therapy on angiomyogenesis in rats.** (A) Ki67<sup>+</sup> cells (green) were detected and quantified in the peri-infarct area 21 days after MI. Scale bars = 50  $\mu$ m. Regions

outlined by dashed box shown at higher magnification below. Scale bars in snapshot =10  $\mu\text{m}$ . (B) Ki67<sup>+</sup> cells were counted per HPF via the NIH ImageJ software.  $n = 5$  in each group. (C) pH3<sup>+</sup> (green) were detected in the peri-infarct area. Scale bars = 50  $\mu\text{m}$ . Regions outlined by dashed box shown at higher magnification below. Scale bars in snapshot =10  $\mu\text{m}$ . (D) pH3<sup>+</sup> cells and (E) pH3<sup>+</sup> cardiomyocytes (nuclei that overlaid with  $\alpha\text{-SA}^+$  cells also overlaid with pH3<sup>+</sup> signals) were counted per HPF via the NIH ImageJ software.  $n = 5$  in each group. (F) vWF<sup>+</sup> (green) was detected in the peri-infarct area. Scale bars = 100  $\mu\text{m}$ . (G) Pooled data of vWF<sup>+</sup> signal quantification via the NIH ImageJ software.  $n = 5$  in each group. All data are means  $\pm$  SD. Comparisons among groups were performed using one-way ANOVA followed by *post hoc* Bonferroni test. The comparisons between samples are indicated by lines, and the statistical significance is indicated by asterisks above the lines. \* $P < 0.05$ , \*\* $P < 0.01$ , \*\*\* $P < 0.001$  and \*\*\*\* $P < 0.0001$ .

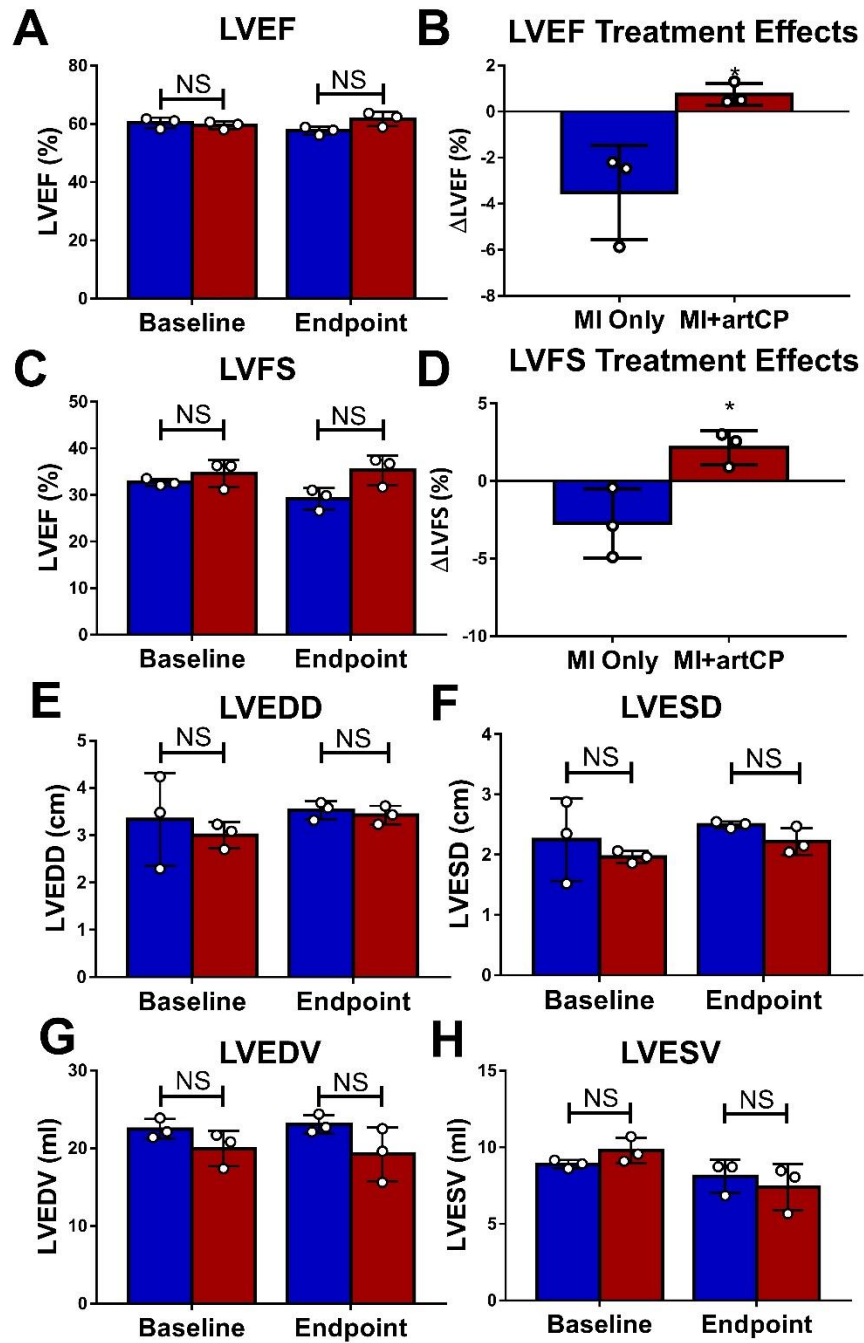

**Fig. S15. Cardiac functional assessment of artCP therapy in a porcine MI model. (A)** LVEF was measured 4 hours (baseline) and 7 days (end point) post-MI. **(B)** Treatment effects were

determined as the changes in LVEF from 4 hours after MI to 7 days after MI. (C) LVFS was measured at 4 hours (baseline) and 7 days (end point) after MI. (D) Treatment effects were determined as the changes in LVFS from 4 hours after MI to 7 days after MI.  $n = 3$  in each group. From M-mode images at chordae tendineae level, LVEDDs at 4 hours (baseline) and 7 days (end point) after MI (E) were measured. Likewise, LVESDs at 4 hours (baseline) and 7 days (endpoint) after MI (F) were measured. From B-mode at long axis, LVEDVs at 4 hours (baseline) and 7 days (end point) after MI (G) were measured. LVESVs were also measured at 4 hours (baseline) and 7 days (end point) after MI (H).  $n = 3$  in each group. All data are means  $\pm$  SD. Comparisons among groups were performed using one-way ANOVA followed by post hoc Bonferroni test. The comparisons between samples are indicated by lines, and the statistical significance indicates by asterisks above the lines. NS indicates  $P > 0.05$  and  $*P < 0.05$ .

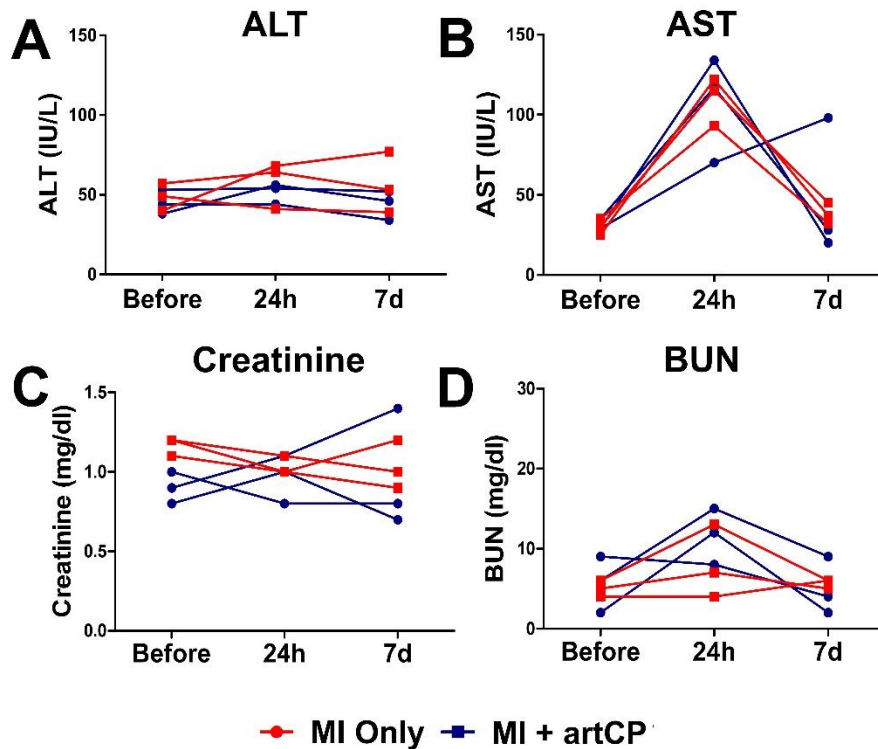

**Fig. S16. Effects of artCP transplantation on liver and kidney functions in the porcine MI model.** (A) Alanine aminotransferase (ALT) and (B) aspartate aminotransferase (AST) concentrations in sera. (C-D) Blood creatinine (C) and urea nitrogen (D) concentrations were determined to evaluate the potential kidney toxicity of artCP transplantation.  $n = 3$  in each group. All data are means  $\pm$  SD. Comparisons among groups were performed using one-way ANOVA followed by post hoc Bonferroni test. NS indicates  $P > 0.05$ .

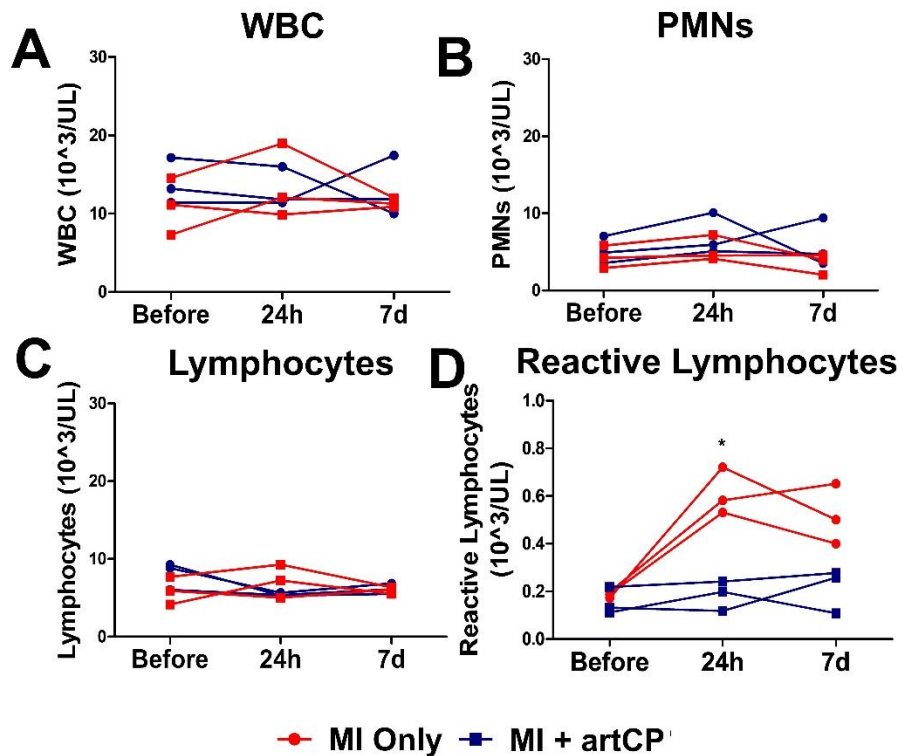

**Fig. S17. Immunogenicity analysis of artCP transplantation in the porcine MI model.** (A) WBCs, (B) PMNs, (C) lymphocytes, and (D) reactive lymphocytes were quantified before MI, 24 hours after MI, and 7 days after MI.  $n = 3$  in each group. All data are means  $\pm$  SD. Comparisons among groups were performed using one-way ANOVA followed by post hoc Bonferroni test. NS indicates  $P > 0.05$  and  $*P < 0.05$ .

**Table S1. myoECM average tension/stress versus strain.**

| myoECM Average Tension/Stress vs Strain |                |            |              |            |
|-----------------------------------------|----------------|------------|--------------|------------|
| Strain Zeroed (mm/mm)                   | Tension (N/mm) | SE         | Stress (kPa) | SE         |
| 0.00000000                              | 0.00288102     | 0.00038703 | 1.95243197   | 0.39317894 |
| 0.00124474                              | 0.00306895     | 0.00041314 | 2.07050067   | 0.39934343 |
| 0.00238667                              | 0.00317183     | 0.00044181 | 2.13666173   | 0.41310129 |
| 0.00349637                              | 0.00346492     | 0.00049945 | 2.35680913   | 0.50886676 |
| 0.00461028                              | 0.00364234     | 0.00051122 | 2.46469504   | 0.50489859 |
| 0.00572445                              | 0.00369881     | 0.00046926 | 2.49494112   | 0.47088724 |
| 0.00682416                              | 0.00385991     | 0.00047319 | 2.61602773   | 0.49982681 |
| 0.00794144                              | 0.00395734     | 0.00051085 | 2.67939515   | 0.52069605 |
| 0.00905432                              | 0.00416820     | 0.00052079 | 2.82248808   | 0.54440265 |
| 0.01016352                              | 0.00424432     | 0.00053331 | 2.87079025   | 0.55200993 |
| 0.01126351                              | 0.00440505     | 0.00055259 | 2.98289021   | 0.57722940 |
| 0.01236969                              | 0.00463599     | 0.00059492 | 3.15584427   | 0.64511677 |
| 0.01347662                              | 0.00475212     | 0.00054812 | 3.21857535   | 0.59109741 |
| 0.01458798                              | 0.00485358     | 0.00063350 | 3.28351217   | 0.63712024 |
| 0.01569717                              | 0.00505358     | 0.00063256 | 3.42063167   | 0.65633983 |
| 0.01681055                              | 0.00514050     | 0.00062307 | 3.47924725   | 0.65523822 |
| 0.01792339                              | 0.00531192     | 0.00062387 | 3.61338551   | 0.70026833 |
| 0.01903150                              | 0.00548505     | 0.00067218 | 3.73209168   | 0.73805565 |
| 0.02014149                              | 0.00568209     | 0.00071522 | 3.86397645   | 0.77474803 |
| 0.02125885                              | 0.00581858     | 0.00068740 | 3.94218221   | 0.73655351 |
| 0.02236266                              | 0.00599164     | 0.00072691 | 4.08014501   | 0.80525318 |
| 0.02347033                              | 0.00615511     | 0.00073608 | 4.17670966   | 0.79760263 |
| 0.02457915                              | 0.00620740     | 0.00073448 | 4.21149716   | 0.79620053 |
| 0.02568964                              | 0.00646784     | 0.00081821 | 4.39840675   | 0.88222194 |
| 0.02679791                              | 0.00661654     | 0.00079696 | 4.49935818   | 0.88285285 |
| 0.02790818                              | 0.00679985     | 0.00080896 | 4.61832977   | 0.88263739 |
| 0.02902148                              | 0.00692698     | 0.00082330 | 4.71397567   | 0.91863803 |
| 0.03013260                              | 0.00709861     | 0.00084703 | 4.83644604   | 0.95818710 |
| 0.03123786                              | 0.00717316     | 0.00085639 | 4.89067206   | 0.97261789 |
| 0.03234320                              | 0.00739023     | 0.00088782 | 5.03428836   | 0.99641053 |
| 0.03346329                              | 0.00761854     | 0.00091332 | 5.19121567   | 1.02651169 |
| 0.03456264                              | 0.00781147     | 0.00092112 | 5.31820372   | 1.03862589 |
| 0.03567038                              | 0.00788299     | 0.00093597 | 5.36509707   | 1.05099600 |
| 0.03678145                              | 0.00817781     | 0.00098557 | 5.57571146   | 1.11012057 |
| 0.03789325                              | 0.00821916     | 0.00099389 | 5.59834383   | 1.11307776 |
| 0.03900272                              | 0.00845224     | 0.00099887 | 5.76069007   | 1.13858794 |
| 0.04011996                              | 0.00868415     | 0.00108576 | 5.93620166   | 1.22963491 |



|            |            |            |             |            |
|------------|------------|------------|-------------|------------|
| 0.04122374 | 0.00887310 | 0.00110847 | 6.04573889  | 1.21794175 |
| 0.04233498 | 0.00897294 | 0.00110089 | 6.11865394  | 1.23476062 |
| 0.04344062 | 0.00914748 | 0.00110623 | 6.23653181  | 1.24990666 |
| 0.04455846 | 0.00933168 | 0.00114935 | 6.38148683  | 1.31870779 |
| 0.04566584 | 0.00959019 | 0.00118343 | 6.54931201  | 1.33731399 |
| 0.04676878 | 0.00979515 | 0.00121394 | 6.68288384  | 1.36075891 |
| 0.04787715 | 0.00999079 | 0.00128348 | 6.82540824  | 1.42901934 |
| 0.04899029 | 0.01008074 | 0.00124834 | 6.88674567  | 1.41525735 |
| 0.05009881 | 0.01032902 | 0.00126362 | 7.05789720  | 1.44431709 |
| 0.05120906 | 0.01070771 | 0.00128271 | 7.31352016  | 1.47577093 |
| 0.05231396 | 0.01072966 | 0.00131832 | 7.33114360  | 1.50000748 |
| 0.05342782 | 0.01086709 | 0.00134725 | 7.42590310  | 1.52877579 |
| 0.05453969 | 0.01115003 | 0.00138993 | 7.62696158  | 1.58267979 |
| 0.05564404 | 0.01125450 | 0.00144077 | 7.70356055  | 1.62638282 |
| 0.05676350 | 0.01150231 | 0.00144128 | 7.86501707  | 1.63345963 |
| 0.05786318 | 0.01169747 | 0.00151503 | 8.01558146  | 1.71995054 |
| 0.05897550 | 0.01193215 | 0.00149656 | 8.16419104  | 1.70508457 |
| 0.06008339 | 0.01211919 | 0.00151295 | 8.29813422  | 1.73760589 |
| 0.06120547 | 0.01228040 | 0.00155735 | 8.41095447  | 1.77533026 |
| 0.06230465 | 0.01253533 | 0.00161473 | 8.59351312  | 1.84075261 |
| 0.06341288 | 0.01276735 | 0.00161482 | 8.74436745  | 1.85032874 |
| 0.06452563 | 0.01299114 | 0.00165103 | 8.90394616  | 1.89461857 |
| 0.06564412 | 0.01309296 | 0.00167868 | 8.98490995  | 1.93412971 |
| 0.06675126 | 0.01328785 | 0.00174839 | 9.12750191  | 2.00470084 |
| 0.06784670 | 0.01355737 | 0.00178199 | 9.29940952  | 2.02230072 |
| 0.06895426 | 0.01393627 | 0.00176973 | 9.54384187  | 2.01843979 |
| 0.07007653 | 0.01402733 | 0.00180600 | 9.62117917  | 2.07487328 |
| 0.07117999 | 0.01411514 | 0.00185752 | 9.70323287  | 2.13905734 |
| 0.07229141 | 0.01442371 | 0.00190172 | 9.90385587  | 2.17655004 |
| 0.07339762 | 0.01460354 | 0.00197253 | 10.04131483 | 2.24469482 |
| 0.07451210 | 0.01476094 | 0.00198402 | 10.14643818 | 2.25995317 |
| 0.07562048 | 0.01503376 | 0.00200931 | 10.33380585 | 2.29487829 |
| 0.07673372 | 0.01520365 | 0.00202918 | 10.44925968 | 2.32235122 |
| 0.07784081 | 0.01545890 | 0.00207388 | 10.62717557 | 2.36844035 |
| 0.07895736 | 0.01561198 | 0.00214541 | 10.74697158 | 2.43988929 |
| 0.08005455 | 0.01569216 | 0.00221522 | 10.82018460 | 2.51551653 |
| 0.08117341 | 0.01604454 | 0.00223178 | 11.05143232 | 2.53582830 |
| 0.08228031 | 0.01628120 | 0.00222019 | 11.20673510 | 2.53671509 |
| 0.08338966 | 0.01648706 | 0.00229449 | 11.36849515 | 2.62329862 |
| 0.08449134 | 0.01671856 | 0.00231048 | 11.52471915 | 2.64551098 |
| 0.08559985 | 0.01686557 | 0.00236507 | 11.63039111 | 2.69321812 |
| 0.08671007 | 0.01709565 | 0.00241583 | 11.79206442 | 2.74887080 |
| 0.08782102 | 0.01747404 | 0.00245147 | 12.05250172 | 2.79808473 |
| 0.08893181 | 0.01763653 | 0.00252063 | 12.16663626 | 2.85094438 |

|            |            |            |             |            |
|------------|------------|------------|-------------|------------|
| 0.09004304 | 0.01778939 | 0.00248807 | 12.27439039 | 2.85160183 |
| 0.09115381 | 0.01807422 | 0.00260459 | 12.48394415 | 2.95753287 |
| 0.09226134 | 0.01838441 | 0.00263393 | 12.69045841 | 2.99229801 |
| 0.09337475 | 0.01846812 | 0.00266550 | 12.76258060 | 3.03270744 |
| 0.09448225 | 0.01871067 | 0.00273582 | 12.92864777 | 3.09328767 |
| 0.09559127 | 0.01903008 | 0.00277587 | 13.15834699 | 3.15720621 |
| 0.09669603 | 0.01923822 | 0.00280778 | 13.29233103 | 3.17683222 |
| 0.09781975 | 0.01935221 | 0.00284371 | 13.39087909 | 3.23559445 |
| 0.09891757 | 0.01970612 | 0.00291408 | 13.63631277 | 3.30271912 |
| 0.10003193 | 0.01989372 | 0.00295540 | 13.76975096 | 3.35214357 |
| 0.10113536 | 0.02014084 | 0.00302601 | 13.94486625 | 3.41670441 |
| 0.10225720 | 0.02038244 | 0.00305218 | 14.11509317 | 3.46054781 |
| 0.10335691 | 0.02059369 | 0.00308996 | 14.26183433 | 3.49696262 |
| 0.10446690 | 0.02087881 | 0.00318181 | 14.46972675 | 3.58610116 |
| 0.10557743 | 0.02110433 | 0.00323900 | 14.62538021 | 3.63468411 |
| 0.10669213 | 0.02123129 | 0.00325140 | 14.72258012 | 3.66916392 |
| 0.10779319 | 0.02161425 | 0.00328800 | 14.98160104 | 3.71608451 |
| 0.10890140 | 0.02191839 | 0.00340855 | 15.19862786 | 3.81670733 |
| 0.11001727 | 0.02205069 | 0.00341325 | 15.29831417 | 3.84269844 |
| 0.11112333 | 0.02233596 | 0.00348373 | 15.50284382 | 3.91296643 |
| 0.11223037 | 0.02261065 | 0.00354856 | 15.69681492 | 3.97958435 |
| 0.11335419 | 0.02292325 | 0.00357157 | 15.90844481 | 4.00998969 |
| 0.11445504 | 0.02309500 | 0.00362623 | 16.03064550 | 4.06196853 |
| 0.11557456 | 0.02333707 | 0.00368154 | 16.21003596 | 4.13177668 |
| 0.11666797 | 0.02357453 | 0.00378772 | 16.40189438 | 4.24842299 |
| 0.11778557 | 0.02392335 | 0.00380041 | 16.63351911 | 4.26863931 |
| 0.11888806 | 0.02414979 | 0.00384548 | 16.78377092 | 4.30488654 |
| 0.11999835 | 0.02443575 | 0.00393711 | 16.99289421 | 4.39904350 |
| 0.12111172 | 0.02460813 | 0.00399969 | 17.12547077 | 4.46742792 |
| 0.12221534 | 0.02485176 | 0.00404716 | 17.30458105 | 4.53141911 |
| 0.12332014 | 0.02531921 | 0.00411441 | 17.61008738 | 4.58151213 |
| 0.12443410 | 0.02553471 | 0.00418269 | 17.77881545 | 4.66763365 |
| 0.12554470 | 0.02580883 | 0.00420476 | 17.96612993 | 4.69595979 |
| 0.12665966 | 0.02600926 | 0.00429101 | 18.11231743 | 4.77481647 |
| 0.12776695 | 0.02626891 | 0.00439809 | 18.30994684 | 4.88499460 |
| 0.12887084 | 0.02659066 | 0.00444642 | 18.54704026 | 4.95433346 |
| 0.12998927 | 0.02700574 | 0.00448417 | 18.81865038 | 4.99077817 |
| 0.13110221 | 0.02720149 | 0.00453058 | 18.95788491 | 5.04051397 |
| 0.13220513 | 0.02745257 | 0.00461779 | 19.14489229 | 5.12626090 |
| 0.13331006 | 0.02765653 | 0.00469497 | 19.29116803 | 5.19442271 |
| 0.13442195 | 0.02795145 | 0.00473681 | 19.51304456 | 5.26428272 |
| 0.13553756 | 0.02846625 | 0.00481521 | 19.86574439 | 5.34987862 |
| 0.13665093 | 0.02870608 | 0.00489387 | 20.03492598 | 5.41867813 |
| 0.13775831 | 0.02890758 | 0.00493900 | 20.17939718 | 5.46546916 |

|            |            |            |             |            |
|------------|------------|------------|-------------|------------|
| 0.13886786 | 0.02917631 | 0.00501082 | 20.37617726 | 5.54485115 |
| 0.13997737 | 0.02944422 | 0.00508299 | 20.57712628 | 5.63030445 |
| 0.14107879 | 0.02975536 | 0.00514794 | 20.80490725 | 5.71168606 |
| 0.14218648 | 0.03023039 | 0.00525006 | 21.12377120 | 5.79459846 |
| 0.14329595 | 0.03043816 | 0.00532195 | 21.28521380 | 5.87174475 |
| 0.14440105 | 0.03072266 | 0.00536408 | 21.48456740 | 5.92565602 |
| 0.14551411 | 0.03104997 | 0.00543260 | 21.71392767 | 5.99381151 |
| 0.14663102 | 0.03125803 | 0.00550648 | 21.87419619 | 6.07580856 |
| 0.14774361 | 0.03171296 | 0.00557431 | 22.18442689 | 6.14648932 |
| 0.14884088 | 0.03194788 | 0.00567017 | 22.36116039 | 6.24107302 |
| 0.14995512 | 0.03224650 | 0.00576550 | 22.58073276 | 6.33404062 |
| 0.15106563 | 0.03254421 | 0.00580990 | 22.78710262 | 6.38478174 |
| 0.15218451 | 0.03287362 | 0.00588440 | 23.02261420 | 6.46808422 |
| 0.15329137 | 0.03320910 | 0.00590209 | 23.25376255 | 6.50303337 |
| 0.15438984 | 0.03355842 | 0.00603033 | 23.51149080 | 6.62644935 |
| 0.15549918 | 0.03387814 | 0.00610828 | 23.73884434 | 6.70620875 |
| 0.15661542 | 0.03421464 | 0.00617009 | 23.96969508 | 6.77251116 |
| 0.15772498 | 0.03449456 | 0.00629254 | 24.18864402 | 6.89114159 |
| 0.15883677 | 0.03481091 | 0.00634660 | 24.41322574 | 6.95627232 |
| 0.15993959 | 0.03517677 | 0.00643312 | 24.66713967 | 7.04040782 |
| 0.16105818 | 0.03558448 | 0.00646857 | 24.95117902 | 7.09438224 |
| 0.16216786 | 0.03588953 | 0.00656371 | 25.18191951 | 7.19451963 |
| 0.16327435 | 0.03624348 | 0.00667304 | 25.43877112 | 7.30418807 |
| 0.16438336 | 0.03655702 | 0.00670504 | 25.65258200 | 7.34621664 |
| 0.16548153 | 0.03689202 | 0.00680683 | 25.89304174 | 7.44153078 |
| 0.16659809 | 0.03727831 | 0.00685783 | 26.16626900 | 7.51069886 |
| 0.16770850 | 0.03757642 | 0.00695367 | 26.38514397 | 7.60368404 |
| 0.16882219 | 0.03804212 | 0.00703078 | 26.70412539 | 7.68806122 |
| 0.16992816 | 0.03838526 | 0.00712645 | 26.95570611 | 7.78615559 |
| 0.17103924 | 0.03861110 | 0.00720186 | 27.12763940 | 7.86546301 |
| 0.17214900 | 0.03899161 | 0.00727822 | 27.39293861 | 7.94425936 |
| 0.17325812 | 0.03932717 | 0.00736702 | 27.63888774 | 8.04377656 |
| 0.17436964 | 0.03977620 | 0.00743811 | 27.94981077 | 8.12067916 |
| 0.17547819 | 0.04019563 | 0.00749699 | 28.24566595 | 8.19576966 |
| 0.17658653 | 0.04043585 | 0.00759388 | 28.42873871 | 8.29227936 |
| 0.17769092 | 0.04077201 | 0.00770342 | 28.67690845 | 8.40320092 |
| 0.17880506 | 0.04121729 | 0.00781820 | 28.99512430 | 8.51899389 |
| 0.17991293 | 0.04162619 | 0.00785803 | 29.27287602 | 8.56579719 |
| 0.18102165 | 0.04188263 | 0.00793926 | 29.46292725 | 8.64912014 |
| 0.18213090 | 0.04230155 | 0.00804259 | 29.76023317 | 8.75062495 |
| 0.18325258 | 0.04267880 | 0.00813500 | 30.03702625 | 8.85448483 |
| 0.18435362 | 0.04298723 | 0.00818807 | 30.25154251 | 8.91501533 |
| 0.18546781 | 0.04342965 | 0.00821789 | 30.54791220 | 8.95309897 |
| 0.18657175 | 0.04375955 | 0.00838803 | 30.80446216 | 9.11592363 |

|            |            |            |             |             |
|------------|------------|------------|-------------|-------------|
| 0.18768380 | 0.04425263 | 0.00845403 | 31.15250729 | 9.19918926  |
| 0.18878584 | 0.04459147 | 0.00850401 | 31.38746568 | 9.25512283  |
| 0.18989762 | 0.04488643 | 0.00858836 | 31.60634591 | 9.34659237  |
| 0.19100322 | 0.04530423 | 0.00872276 | 31.90587641 | 9.47267501  |
| 0.19212034 | 0.04575577 | 0.00877878 | 32.21533837 | 9.53696742  |
| 0.19322843 | 0.04614227 | 0.00885498 | 32.49761048 | 9.62768692  |
| 0.19434326 | 0.04647845 | 0.00896145 | 32.74142385 | 9.72885068  |
| 0.19544418 | 0.04681977 | 0.00905316 | 32.99581594 | 9.83632691  |
| 0.19655667 | 0.04723062 | 0.00913522 | 33.28113802 | 9.91488321  |
| 0.19766042 | 0.04774900 | 0.00921170 | 33.63986237 | 10.00204669 |
| 0.19877404 | 0.04808498 | 0.00930352 | 33.89062082 | 10.10633836 |
| 0.19987697 | 0.04852103 | 0.00935951 | 34.18925556 | 10.16650789 |
| 0.20099354 | 0.04890238 | 0.00947003 | 34.47492302 | 10.29033077 |
| 0.20209981 | 0.04932843 | 0.00956045 | 34.77422997 | 10.38242291 |
| 0.20321700 | 0.04970401 | 0.00963808 | 35.03795364 | 10.46250107 |
| 0.20433502 | 0.05015968 | 0.00971080 | 35.35059204 | 10.53915895 |
| 0.20544118 | 0.05052166 | 0.00984564 | 35.62439679 | 10.67209349 |
| 0.20654593 | 0.05101040 | 0.00991937 | 35.96843681 | 10.76519622 |
| 0.20765923 | 0.05134836 | 0.01002719 | 36.22395344 | 10.87949176 |
| 0.20876746 | 0.05171056 | 0.01008925 | 36.47246837 | 10.94180566 |
| 0.20987281 | 0.05213592 | 0.01015554 | 36.77162738 | 11.01832500 |
| 0.21097714 | 0.05255077 | 0.01026216 | 37.07245657 | 11.12939337 |
| 0.21208784 | 0.05306310 | 0.01036172 | 37.42618752 | 11.22906097 |
| 0.21320127 | 0.05346734 | 0.01043752 | 37.71091944 | 11.31125615 |
| 0.21429972 | 0.05379991 | 0.01057512 | 37.96707448 | 11.44702335 |
| 0.21541076 | 0.05419576 | 0.01062652 | 38.24427261 | 11.51123365 |
| 0.21652653 | 0.05469887 | 0.01072761 | 38.59065915 | 11.60879708 |
| 0.21763957 | 0.05509056 | 0.01078092 | 38.86501037 | 11.67722227 |
| 0.21873764 | 0.05552120 | 0.01091309 | 39.17243646 | 11.80027010 |
| 0.21984943 | 0.05584754 | 0.01101821 | 39.43071089 | 11.92424824 |
| 0.22096100 | 0.05626972 | 0.01109051 | 39.72996539 | 12.00827050 |
| 0.22207709 | 0.05681434 | 0.01118050 | 40.09457490 | 12.09011062 |
| 0.22318481 | 0.05723034 | 0.01125679 | 40.38828915 | 12.17315794 |
| 0.22428724 | 0.05767487 | 0.01134240 | 40.70795353 | 12.26960865 |
| 0.22540358 | 0.05807903 | 0.01144314 | 41.00597675 | 12.38286738 |
| 0.22651959 | 0.05847428 | 0.01154670 | 41.29388793 | 12.48986990 |
| 0.22762714 | 0.05892601 | 0.01165295 | 41.61018285 | 12.59552934 |
| 0.22874609 | 0.05942350 | 0.01174187 | 41.96006421 | 12.69007000 |
| 0.22984199 | 0.05991622 | 0.01183810 | 42.31049296 | 12.79725757 |
| 0.23095414 | 0.06035438 | 0.01190160 | 42.61341688 | 12.86738607 |
| 0.23206243 | 0.06080583 | 0.01198175 | 42.93177984 | 12.95274032 |
| 0.23317373 | 0.06120654 | 0.01207467 | 43.22561332 | 13.06322125 |
| 0.23427826 | 0.06166080 | 0.01221004 | 43.55600060 | 13.19359934 |
| 0.23538361 | 0.06210185 | 0.01228260 | 43.87058578 | 13.28187118 |

|            |            |            |             |             |
|------------|------------|------------|-------------|-------------|
| 0.23649638 | 0.06255991 | 0.01237358 | 44.19220874 | 13.37722990 |
| 0.23761348 | 0.06299879 | 0.01244228 | 44.50023849 | 13.45523171 |
| 0.23872073 | 0.06348633 | 0.01249408 | 44.83694070 | 13.52378940 |
| 0.23983137 | 0.06388665 | 0.01260316 | 45.12800935 | 13.63411342 |
| 0.24093377 | 0.06434651 | 0.01263353 | 45.43625149 | 13.67578182 |
| 0.24204673 | 0.06478876 | 0.01276661 | 45.76630638 | 13.81547420 |
| 0.24315351 | 0.06530687 | 0.01281325 | 46.11830485 | 13.87175131 |
| 0.24426623 | 0.06577775 | 0.01289859 | 46.44893093 | 13.96509836 |
| 0.24536803 | 0.06614407 | 0.01297737 | 46.71289973 | 14.04892910 |
| 0.24647630 | 0.06663721 | 0.01308625 | 47.06373376 | 14.15912469 |
| 0.24759416 | 0.06713524 | 0.01315393 | 47.40604301 | 14.23855813 |
| 0.24871222 | 0.06765417 | 0.01329007 | 47.78517771 | 14.37934142 |
| 0.24982466 | 0.06806627 | 0.01337757 | 48.08362640 | 14.48089388 |
| 0.25091873 | 0.06847249 | 0.01338486 | 48.35386895 | 14.50283519 |
| 0.25203208 | 0.06898372 | 0.01343526 | 48.70687493 | 14.56685804 |
| 0.25314577 | 0.06941694 | 0.01351971 | 49.01314341 | 14.65838115 |
| 0.25425769 | 0.06986520 | 0.01363015 | 49.33641310 | 14.76950605 |
| 0.25535621 | 0.07033819 | 0.01375159 | 49.68031481 | 14.90089016 |
| 0.25647382 | 0.07086511 | 0.01381100 | 50.03714105 | 14.96591773 |
| 0.25757852 | 0.07130291 | 0.01392176 | 50.35279185 | 15.07778988 |
| 0.25869490 | 0.07171079 | 0.01397863 | 50.64295053 | 15.15450949 |
| 0.25980911 | 0.07226699 | 0.01408890 | 51.03851456 | 15.27368872 |
| 0.26091023 | 0.07275723 | 0.01418254 | 51.38623659 | 15.37689753 |
| 0.26201935 | 0.07328305 | 0.01429664 | 51.74799284 | 15.47826757 |
| 0.26312529 | 0.07372761 | 0.01439610 | 52.07907926 | 15.59805571 |
| 0.26423765 | 0.07419386 | 0.01441959 | 52.40159914 | 15.64585599 |
| 0.26534581 | 0.07473679 | 0.01448681 | 52.77755976 | 15.72446903 |
| 0.26645372 | 0.07513637 | 0.01462073 | 53.05812129 | 15.84129289 |
| 0.26756056 | 0.07563833 | 0.01471123 | 53.41566889 | 15.94321209 |

---

**Table S2. NHT average tension/stress versus strain.**

| NHT Average Tension/Stress vs Strain |                   |            |                 |            |
|--------------------------------------|-------------------|------------|-----------------|------------|
| Strain<br>Zeroed<br>(mm/mm)          | Tension<br>(N/mm) | SE         | Stress<br>(kPa) | SE         |
| 0.0000000                            | 0.00381355        | 0.00047537 | 2.24432947      | 0.33409264 |
| 0.00108457                           | 0.00386963        | 0.00051122 | 2.27478897      | 0.34785722 |
| 0.00217403                           | 0.00400603        | 0.00057254 | 2.35870560      | 0.38924440 |
| 0.00323237                           | 0.00406895        | 0.00056435 | 2.39300725      | 0.37629922 |
| 0.00428583                           | 0.00415407        | 0.00061904 | 2.43443456      | 0.38933452 |
| 0.00534094                           | 0.00438092        | 0.00066806 | 2.57099346      | 0.42918517 |
| 0.00638987                           | 0.00432565        | 0.00068325 | 2.53640886      | 0.42574780 |
| 0.00743952                           | 0.00448214        | 0.00075912 | 2.63046480      | 0.47024609 |
| 0.00848513                           | 0.00466051        | 0.00075880 | 2.73438273      | 0.47206437 |
| 0.00954015                           | 0.00472198        | 0.00080772 | 2.77435653      | 0.50582191 |
| 0.01060066                           | 0.00481133        | 0.00087339 | 2.81641484      | 0.52117611 |
| 0.01163984                           | 0.00505269        | 0.00090130 | 2.95689142      | 0.53701614 |
| 0.01269667                           | 0.00507386        | 0.00096221 | 2.97596896      | 0.58216448 |
| 0.01375339                           | 0.00497997        | 0.00097067 | 2.91827596      | 0.57844240 |
| 0.01479839                           | 0.00528290        | 0.00099285 | 3.09718062      | 0.59541766 |
| 0.01584298                           | 0.00544031        | 0.00107804 | 3.19015052      | 0.64125901 |
| 0.01690560                           | 0.00545831        | 0.00107468 | 3.19760608      | 0.63556847 |
| 0.01795723                           | 0.00558899        | 0.00114773 | 3.26533927      | 0.66219750 |
| 0.01900914                           | 0.00572717        | 0.00127426 | 3.34826678      | 0.73529290 |
| 0.02006021                           | 0.00577625        | 0.00123186 | 3.38348177      | 0.71887847 |
| 0.02111284                           | 0.00594643        | 0.00128485 | 3.47705872      | 0.74005315 |
| 0.02216340                           | 0.00608413        | 0.00136193 | 3.56421836      | 0.79019613 |
| 0.02321500                           | 0.00619011        | 0.00141559 | 3.62345402      | 0.81606342 |
| 0.02426310                           | 0.00626043        | 0.00149706 | 3.65864201      | 0.85313263 |
| 0.02531563                           | 0.00645059        | 0.00147834 | 3.77067786      | 0.84509502 |
| 0.02637128                           | 0.00663198        | 0.00156226 | 3.88222281      | 0.89650840 |
| 0.02742701                           | 0.00665181        | 0.00163068 | 3.89141070      | 0.93160396 |
| 0.02847482                           | 0.00689975        | 0.00166761 | 4.03126862      | 0.94628383 |
| 0.02952401                           | 0.00695192        | 0.00172658 | 4.06545231      | 0.98199679 |
| 0.03058368                           | 0.00703996        | 0.00178512 | 4.12020114      | 1.01722492 |
| 0.03161702                           | 0.00728029        | 0.00183580 | 4.25156963      | 1.03653752 |
| 0.03267721                           | 0.00735724        | 0.00189098 | 4.29892257      | 1.06773792 |
| 0.03373004                           | 0.00751380        | 0.00197545 | 4.39477722      | 1.11401286 |
| 0.03478206                           | 0.00765406        | 0.00202174 | 4.47546319      | 1.14341466 |
| 0.03582820                           | 0.00780791        | 0.00208810 | 4.56206875      | 1.17714943 |
| 0.03688153                           | 0.00800309        | 0.00215372 | 4.67480215      | 1.20907266 |
| 0.03793528                           | 0.00803468        | 0.00224685 | 4.69268442      | 1.25794530 |
| 0.03898725                           | 0.00827829        | 0.00230072 | 4.83709338      | 1.29232522 |

|            |            |            |            |            |
|------------|------------|------------|------------|------------|
| 0.04003251 | 0.00842595 | 0.00237880 | 4.92119873 | 1.33059628 |
| 0.04109464 | 0.00859629 | 0.00245533 | 5.02072187 | 1.37251583 |
| 0.04214492 | 0.00874794 | 0.00248832 | 5.11113525 | 1.39570849 |
| 0.04319912 | 0.00881029 | 0.00259242 | 5.14323104 | 1.45131582 |
| 0.04424908 | 0.00894333 | 0.00269612 | 5.21948215 | 1.50382651 |
| 0.04529723 | 0.00925409 | 0.00273639 | 5.40384397 | 1.52642069 |
| 0.04634972 | 0.00933881 | 0.00283287 | 5.45310587 | 1.58213769 |
| 0.04739914 | 0.00947895 | 0.00290557 | 5.52940931 | 1.61564148 |
| 0.04844845 | 0.00976227 | 0.00295267 | 5.70008635 | 1.64358211 |
| 0.04950408 | 0.00985882 | 0.00306145 | 5.75172665 | 1.70146902 |
| 0.05054901 | 0.00992331 | 0.00313045 | 5.78945248 | 1.74154277 |
| 0.05160265 | 0.01024730 | 0.00319328 | 5.98145127 | 1.77739699 |
| 0.05265562 | 0.01043710 | 0.00332160 | 6.08946508 | 1.84339110 |
| 0.05371532 | 0.01059408 | 0.00340225 | 6.17464955 | 1.88077935 |
| 0.05475832 | 0.01083336 | 0.00347641 | 6.31590933 | 1.92427655 |
| 0.05580933 | 0.01106718 | 0.00361263 | 6.45772627 | 2.00361438 |
| 0.05686481 | 0.01107491 | 0.00365296 | 6.45599166 | 2.01999985 |
| 0.05791742 | 0.01128344 | 0.00368479 | 6.58115345 | 2.03987053 |
| 0.05897022 | 0.01156931 | 0.00381323 | 6.74598605 | 2.10874169 |
| 0.06001716 | 0.01165139 | 0.00392047 | 6.79030976 | 2.16386973 |
| 0.06107484 | 0.01180997 | 0.00395514 | 6.88521633 | 2.18386937 |
| 0.06212619 | 0.01203720 | 0.00405194 | 7.01716216 | 2.23827895 |
| 0.06317491 | 0.01216608 | 0.00412471 | 7.09303038 | 2.27826308 |
| 0.06422746 | 0.01238047 | 0.00419708 | 7.20970286 | 2.31069925 |
| 0.06527721 | 0.01252243 | 0.00424533 | 7.29846854 | 2.34265137 |
| 0.06632958 | 0.01265967 | 0.00432560 | 7.37997773 | 2.38785404 |
| 0.06737527 | 0.01285694 | 0.00444108 | 7.48546242 | 2.44199855 |
| 0.06842544 | 0.01304517 | 0.00447355 | 7.59953177 | 2.46470306 |
| 0.06948352 | 0.01318058 | 0.00457939 | 7.67730761 | 2.52012552 |
| 0.07053083 | 0.01332603 | 0.00469784 | 7.75566353 | 2.58097634 |
| 0.07158727 | 0.01353525 | 0.00470815 | 7.88370479 | 2.59150155 |
| 0.07263748 | 0.01375215 | 0.00480267 | 8.00836803 | 2.64074233 |
| 0.07369228 | 0.01376912 | 0.00485615 | 8.01457321 | 2.66663056 |
| 0.07474402 | 0.01397364 | 0.00491116 | 8.13372484 | 2.69592371 |
| 0.07579641 | 0.01416265 | 0.00501259 | 8.23529707 | 2.74765154 |
| 0.07684723 | 0.01429954 | 0.00510610 | 8.32448614 | 2.80283422 |
| 0.07790018 | 0.01448383 | 0.00514045 | 8.43315967 | 2.82439601 |
| 0.07894364 | 0.01464923 | 0.00520563 | 8.52005805 | 2.85227034 |
| 0.07999523 | 0.01477995 | 0.00531979 | 8.59561285 | 2.91407644 |
| 0.08104875 | 0.01488095 | 0.00535080 | 8.65808981 | 2.93356172 |
| 0.08210907 | 0.01506763 | 0.00543854 | 8.76436758 | 2.97888131 |
| 0.08315419 | 0.01528540 | 0.00557253 | 8.88594116 | 3.04996875 |
| 0.08420469 | 0.01548325 | 0.00557644 | 9.00569558 | 3.05593249 |
| 0.08525902 | 0.01561261 | 0.00567485 | 9.08089514 | 3.10841293 |

|            |            |            |             |            |
|------------|------------|------------|-------------|------------|
| 0.08630968 | 0.01576738 | 0.00578692 | 9.16079657  | 3.16100866 |
| 0.08735518 | 0.01591781 | 0.00582805 | 9.25033847  | 3.18532959 |
| 0.08840510 | 0.01608255 | 0.00587605 | 9.34551179  | 3.21209042 |
| 0.08945817 | 0.01632056 | 0.00597007 | 9.48761424  | 3.26686928 |
| 0.09051268 | 0.01637305 | 0.00606090 | 9.51520341  | 3.31211614 |
| 0.09156779 | 0.01658614 | 0.00612255 | 9.63691338  | 3.34455579 |
| 0.09262454 | 0.01685925 | 0.00621411 | 9.79715374  | 3.39376938 |
| 0.09367102 | 0.01691242 | 0.00628231 | 9.82010093  | 3.42656990 |
| 0.09472557 | 0.01715394 | 0.00635738 | 9.96801840  | 3.47101374 |
| 0.09577040 | 0.01733401 | 0.00641548 | 10.07203263 | 3.50439468 |
| 0.09681913 | 0.01746445 | 0.00655091 | 10.13734176 | 3.56976022 |
| 0.09787525 | 0.01763466 | 0.00661013 | 10.24155481 | 3.60716483 |
| 0.09892427 | 0.01772989 | 0.00664573 | 10.29471302 | 3.62452156 |
| 0.09997718 | 0.01793794 | 0.00678788 | 10.41764689 | 3.70003715 |
| 0.10102780 | 0.01812877 | 0.00688829 | 10.52413013 | 3.75488364 |
| 0.10209310 | 0.01832149 | 0.00692702 | 10.63029731 | 3.77116031 |
| 0.10313347 | 0.01841355 | 0.00699924 | 10.68849078 | 3.81099323 |
| 0.10418337 | 0.01864227 | 0.00707893 | 10.81958480 | 3.85582549 |
| 0.10523519 | 0.01889751 | 0.00714318 | 10.96688812 | 3.89025797 |
| 0.10628657 | 0.01899652 | 0.00726149 | 11.02238679 | 3.95192074 |
| 0.10734041 | 0.01916448 | 0.00734050 | 11.11908419 | 3.99494785 |
| 0.10838860 | 0.01938008 | 0.00741111 | 11.24235675 | 4.03297191 |
| 0.10943867 | 0.01946211 | 0.00747076 | 11.28856121 | 4.06382409 |
| 0.11049203 | 0.01971182 | 0.00754372 | 11.43025273 | 4.10172928 |
| 0.11154436 | 0.01987047 | 0.00764196 | 11.52336544 | 4.15525947 |
| 0.11259897 | 0.01998001 | 0.00771121 | 11.58252918 | 4.19175142 |
| 0.11364966 | 0.02021860 | 0.00783365 | 11.72019956 | 4.25781685 |
| 0.11470556 | 0.02048192 | 0.00790721 | 11.87551653 | 4.29719033 |
| 0.11575649 | 0.02054703 | 0.00794166 | 11.90931528 | 4.31432944 |
| 0.11680313 | 0.02068772 | 0.00805500 | 11.99069157 | 4.37417035 |
| 0.11786034 | 0.02096460 | 0.00815454 | 12.15049710 | 4.42828907 |
| 0.11890407 | 0.02112360 | 0.00822192 | 12.23941372 | 4.46386712 |
| 0.11995327 | 0.02125420 | 0.00836681 | 12.31655962 | 4.54288609 |
| 0.12100899 | 0.02148338 | 0.00843449 | 12.45114577 | 4.58082788 |
| 0.12205895 | 0.02169624 | 0.00846459 | 12.57087664 | 4.59489782 |
| 0.12311125 | 0.02187435 | 0.00860548 | 12.67427164 | 4.67045095 |
| 0.12416248 | 0.02210731 | 0.00866314 | 12.80168921 | 4.69998819 |
| 0.12521568 | 0.02225846 | 0.00873871 | 12.89302551 | 4.74151803 |
| 0.12626793 | 0.02244055 | 0.00888812 | 12.99548974 | 4.81782565 |
| 0.12731478 | 0.02266233 | 0.00893746 | 13.12377086 | 4.84835762 |
| 0.12836938 | 0.02279991 | 0.00902841 | 13.20555259 | 4.89748535 |
| 0.12941854 | 0.02293474 | 0.00909389 | 13.27951170 | 4.92991669 |
| 0.13047340 | 0.02316055 | 0.00920203 | 13.40662770 | 4.98958517 |
| 0.13152527 | 0.02334375 | 0.00930857 | 13.51420576 | 5.04698320 |



|            |            |            |             |            |
|------------|------------|------------|-------------|------------|
| 0.13257853 | 0.02365021 | 0.00938976 | 13.68790386 | 5.08778064 |
| 0.13362652 | 0.02376887 | 0.00945361 | 13.75952309 | 5.12108112 |
| 0.13468998 | 0.02401066 | 0.00954028 | 13.89687288 | 5.16893935 |
| 0.13573188 | 0.02418102 | 0.00963276 | 13.98909306 | 5.21654549 |
| 0.13678258 | 0.02436170 | 0.00974452 | 14.09761748 | 5.27641351 |
| 0.13783853 | 0.02455768 | 0.00984162 | 14.20868298 | 5.33019538 |
| 0.13888185 | 0.02478594 | 0.00992418 | 14.33319473 | 5.37114454 |
| 0.13993431 | 0.02495338 | 0.00997816 | 14.43619983 | 5.40209735 |
| 0.14098785 | 0.02526504 | 0.01011519 | 14.61517119 | 5.47490709 |
| 0.14204181 | 0.02537566 | 0.01014578 | 14.67936016 | 5.49165550 |
| 0.14309194 | 0.02554422 | 0.01025621 | 14.76512858 | 5.54595555 |
| 0.14413895 | 0.02582171 | 0.01035875 | 14.93506915 | 5.60321905 |
| 0.14519635 | 0.02598158 | 0.01040416 | 15.02612215 | 5.63059701 |
| 0.14625345 | 0.02623223 | 0.01053195 | 15.17033914 | 5.69710627 |
| 0.14729843 | 0.02641788 | 0.01061270 | 15.27952222 | 5.73987361 |
| 0.14835073 | 0.02662402 | 0.01069679 | 15.39401412 | 5.78574354 |
| 0.14940444 | 0.02682425 | 0.01079949 | 15.50792420 | 5.83965748 |
| 0.15046132 | 0.02691543 | 0.01087926 | 15.55989580 | 5.88199575 |
| 0.15150371 | 0.02720062 | 0.01099515 | 15.72228697 | 5.94344841 |
| 0.15255432 | 0.02747352 | 0.01104350 | 15.88142453 | 5.96814880 |
| 0.15360846 | 0.02765663 | 0.01116549 | 15.98490224 | 6.03556071 |
| 0.15465787 | 0.02790047 | 0.01129227 | 16.12359707 | 6.10227075 |
| 0.15570837 | 0.02808691 | 0.01136596 | 16.22736487 | 6.14032373 |
| 0.15676147 | 0.02820889 | 0.01143729 | 16.30195914 | 6.18073666 |
| 0.15781157 | 0.02855678 | 0.01156309 | 16.50433453 | 6.24693911 |
| 0.15886177 | 0.02874314 | 0.01166036 | 16.60574710 | 6.29609646 |
| 0.15991526 | 0.02893391 | 0.01173331 | 16.71910666 | 6.33960398 |
| 0.16097242 | 0.02904844 | 0.01182249 | 16.77998942 | 6.38668017 |
| 0.16201792 | 0.02936092 | 0.01185151 | 16.96725292 | 6.40024532 |
| 0.16307199 | 0.02952237 | 0.01196168 | 17.05992250 | 6.45966886 |
| 0.16412808 | 0.02980200 | 0.01210072 | 17.22161523 | 6.53630859 |
| 0.16517872 | 0.02993925 | 0.01217338 | 17.29546705 | 6.57449984 |
| 0.16623453 | 0.03014045 | 0.01223015 | 17.40711808 | 6.60493461 |
| 0.16728416 | 0.03030209 | 0.01229951 | 17.50920426 | 6.64371464 |
| 0.16832573 | 0.03044442 | 0.01228156 | 17.58661267 | 6.62960107 |
| 0.16937766 | 0.03060634 | 0.01228408 | 17.68417157 | 6.63235166 |
| 0.17043618 | 0.03073174 | 0.01226437 | 17.76449199 | 6.62599067 |
| 0.17148607 | 0.03091075 | 0.01236724 | 17.86634031 | 6.68173704 |
| 0.17253477 | 0.03118015 | 0.01246926 | 18.01811690 | 6.73464132 |
| 0.17358929 | 0.03142333 | 0.01247367 | 18.16088489 | 6.73713494 |
| 0.17463698 | 0.03158773 | 0.01264499 | 18.25255849 | 6.82757426 |
| 0.17569026 | 0.03181966 | 0.01275590 | 18.37777541 | 6.88412306 |
| 0.17673985 | 0.03209529 | 0.01283176 | 18.54571413 | 6.92874055 |
| 0.17779160 | 0.03230699 | 0.01293530 | 18.66840634 | 6.98362786 |

|            |            |            |             |            |
|------------|------------|------------|-------------|------------|
| 0.17884535 | 0.03257553 | 0.01303281 | 18.81631988 | 7.03189341 |
| 0.17990041 | 0.03278938 | 0.01315251 | 18.93929708 | 7.09613594 |
| 0.18095194 | 0.03296407 | 0.01319876 | 19.04008283 | 7.12247267 |
| 0.18200289 | 0.03322376 | 0.01331091 | 19.19006749 | 7.18430940 |
| 0.18305235 | 0.03349986 | 0.01342283 | 19.34772562 | 7.24390530 |
| 0.18410051 | 0.03367662 | 0.01351301 | 19.45210143 | 7.28967072 |
| 0.18515044 | 0.03392460 | 0.01363727 | 19.58651445 | 7.35557388 |
| 0.18620093 | 0.03414430 | 0.01373006 | 19.71595124 | 7.40740048 |
| 0.18725850 | 0.03437678 | 0.01381386 | 19.84850622 | 7.44982328 |
| 0.18830885 | 0.03467680 | 0.01394155 | 20.02591096 | 7.52010656 |
| 0.18936520 | 0.03499113 | 0.01404673 | 20.20377175 | 7.57558980 |
| 0.19041778 | 0.03518788 | 0.01411272 | 20.31291007 | 7.60994860 |
| 0.19146363 | 0.03533839 | 0.01418163 | 20.40275620 | 7.64805149 |
| 0.19251314 | 0.03552298 | 0.01426947 | 20.50696566 | 7.69420115 |
| 0.19356614 | 0.03583426 | 0.01436628 | 20.68277055 | 7.74203025 |
| 0.19461375 | 0.03597680 | 0.01441455 | 20.76485742 | 7.76790452 |
| 0.19566935 | 0.03631238 | 0.01454157 | 20.96196098 | 7.83968843 |
| 0.19671902 | 0.03650915 | 0.01459855 | 21.07663030 | 7.87086116 |
| 0.19777399 | 0.03662176 | 0.01467980 | 21.12933894 | 7.90884372 |
| 0.19882036 | 0.03695063 | 0.01478559 | 21.32226240 | 7.96690629 |
| 0.19987623 | 0.03727900 | 0.01484662 | 21.51735573 | 8.00209522 |
| 0.20092942 | 0.03734270 | 0.01493173 | 21.54770870 | 8.04481343 |
| 0.20198522 | 0.03761966 | 0.01503864 | 21.70946543 | 8.10319781 |
| 0.20303274 | 0.03784112 | 0.01514705 | 21.83704646 | 8.16209168 |
| 0.20408769 | 0.03809515 | 0.01519522 | 21.98268872 | 8.18548656 |
| 0.20513509 | 0.03828362 | 0.01522850 | 22.08535732 | 8.20186317 |
| 0.20618599 | 0.03857563 | 0.01530169 | 22.26015150 | 8.24307214 |
| 0.20723382 | 0.03883863 | 0.01541526 | 22.41120106 | 8.30281945 |
| 0.20828701 | 0.03892693 | 0.01546742 | 22.45819551 | 8.33120795 |
| 0.20934586 | 0.03931545 | 0.01552292 | 22.68946237 | 8.36041645 |
| 0.21039370 | 0.03948445 | 0.01561767 | 22.78288599 | 8.41045199 |
| 0.21143970 | 0.03960415 | 0.01569979 | 22.85030551 | 8.45683682 |
| 0.21249560 | 0.03996682 | 0.01577322 | 23.05518497 | 8.49222911 |
| 0.21354644 | 0.04021159 | 0.01590330 | 23.20027321 | 8.56494157 |
| 0.21459775 | 0.04030775 | 0.01594783 | 23.25918464 | 8.59070958 |
| 0.21564488 | 0.04055825 | 0.01592959 | 23.40221310 | 8.57945057 |
| 0.21668904 | 0.04083915 | 0.01600099 | 23.56380376 | 8.61665349 |
| 0.21775593 | 0.04098667 | 0.01609476 | 23.64640743 | 8.66628714 |
| 0.21880394 | 0.04121684 | 0.01611480 | 23.78116387 | 8.68005533 |
| 0.21986624 | 0.04148575 | 0.01616753 | 23.94029957 | 8.70650181 |
| 0.22091305 | 0.04168089 | 0.01621173 | 24.05336852 | 8.72850242 |
| 0.22196257 | 0.04188955 | 0.01631184 | 24.16987010 | 8.78340389 |
| 0.22301327 | 0.04209335 | 0.01635551 | 24.29011662 | 8.80792608 |
| 0.22406143 | 0.04232490 | 0.01645734 | 24.42220087 | 8.86179771 |

|            |            |            |             |            |
|------------|------------|------------|-------------|------------|
| 0.22511713 | 0.04246556 | 0.01647904 | 24.50297454 | 8.87299707 |
| 0.22616531 | 0.04269814 | 0.01651254 | 24.64069778 | 8.89300211 |
| 0.22721361 | 0.04288015 | 0.01651927 | 24.74365976 | 8.89445162 |
| 0.22826936 | 0.04305985 | 0.01654154 | 24.85284016 | 8.90850801 |
| 0.22931483 | 0.04325410 | 0.01656341 | 24.96258905 | 8.92004764 |
| 0.23037251 | 0.04338423 | 0.01655655 | 25.03908155 | 8.91725865 |
| 0.23142671 | 0.04360308 | 0.01657166 | 25.17277797 | 8.92686688 |
| 0.23247484 | 0.04381748 | 0.01664781 | 25.30005921 | 8.97187090 |
| 0.23352475 | 0.04412205 | 0.01671294 | 25.46956212 | 9.00193787 |
| 0.23458157 | 0.04425120 | 0.01679386 | 25.54067099 | 9.04462535 |
| 0.23563234 | 0.04462764 | 0.01687561 | 25.75994162 | 9.08747436 |
| 0.23668104 | 0.04488741 | 0.01698119 | 25.91012910 | 9.14509975 |
| 0.23773471 | 0.04510219 | 0.01704628 | 26.03256077 | 9.17984932 |
| 0.23878927 | 0.04543567 | 0.01718453 | 26.22362484 | 9.25388458 |
| 0.23984213 | 0.04563080 | 0.01726671 | 26.33474066 | 9.29797561 |
| 0.24088732 | 0.04602672 | 0.01740218 | 26.56315435 | 9.36939533 |
| 0.24194203 | 0.04633441 | 0.01753351 | 26.73449314 | 9.43933605 |
| 0.24299125 | 0.04666194 | 0.01767919 | 26.92040059 | 9.51535591 |
| 0.24404422 | 0.04689446 | 0.01782500 | 27.05217904 | 9.59304819 |
| 0.24509382 | 0.04723073 | 0.01794898 | 27.24556059 | 9.66142706 |
| 0.24614451 | 0.04750310 | 0.01806079 | 27.39768566 | 9.71750191 |
| 0.24719095 | 0.04775288 | 0.01822017 | 27.53737955 | 9.80218654 |
| 0.24824711 | 0.04799625 | 0.01816639 | 27.68376370 | 9.77756970 |
| 0.24929945 | 0.04811518 | 0.01812313 | 27.75438255 | 9.75179465 |
| 0.25034703 | 0.04827216 | 0.01818759 | 27.84518142 | 9.78817717 |
| 0.25140459 | 0.04858533 | 0.01821593 | 28.02955607 | 9.80448873 |
| 0.25246254 | 0.04870768 | 0.01818799 | 28.10039843 | 9.78867974 |
| 0.25350860 | 0.04854263 | 0.01784724 | 28.01958479 | 9.60950576 |

---
